1 **Relaxin/insulin-like family peptide receptor 4 (Rxfp4) expressing hypothalamic neurons modulate food**  
2 **intake and preference in mice**

3 Author list – Jo E Lewis<sup>1,\*</sup>, Orla RM Woodward<sup>1,\*</sup>, Christopher A Smith<sup>1</sup>, Alice E Adriaenssens<sup>1</sup>, Lawrence  
4 Billing<sup>1</sup>, Cheryl Brighton<sup>1</sup>, Benjamin U Phillips<sup>2</sup>, John A Tadross<sup>1,3</sup>, Sarah J Kinston<sup>4</sup>, Ernesto Ciabatti<sup>4</sup>,  
5 Berthold Göttgens<sup>4</sup>, Marco Tripodi<sup>5</sup>, David Hornigold<sup>6</sup>, David Baker<sup>6</sup>, Fiona M Gribble<sup>1,#</sup>, Frank Reimann<sup>1,#</sup>

6 Affiliations:

7 <sup>1</sup>Wellcome Trust – MRC Institute of Metabolic Science Metabolic Research Laboratories, Addenbrooke's  
8 Hospital, Hills Road, Cambridge, CB2 0QQ, UK

9 <sup>2</sup> Department of Physiology, Development and Neuroscience, University of Cambridge, Cambridge, UK.

10 <sup>3</sup> Department of Pathology, University of Cambridge, Cambridge CB2 1QP, UK

11 <sup>4</sup> Department of Haematology, Wellcome and MRC Cambridge Stem Cell Institute, University of  
12 Cambridge, Cambridge, UK

13 <sup>5</sup>MRC Laboratory of Molecular Biology, Neurobiology Division, Francis Crick Avenue, Cambridge CB2 0QH,  
14 UK

15 <sup>6</sup> Research and Early Development Cardiovascular, Renal and Metabolism (CVRM), BioPharmaceuticals  
16 R&D, AstraZeneca Ltd, Cambridge, UK

17

18 \* These authors contributed equally to this work.

19 # Corresponding authors – acting correspondence: Frank Reimann (email: [fr222@cam.ac.uk](mailto:fr222@cam.ac.uk))

20

21 **Abstract**

22 Relaxin/insulin-like-family peptide receptor-4 (RXFP4), the cognate receptor for insulin-like peptide 5  
23 (INSL5), has previously been implicated in feeding behaviour. To explore *Rxfp4* expression and physiology,  
24 we generated *Rxfp4*-Cre mice. Whole body chemogenetic activation (Dq) or inhibition (Di) of *Rxfp4*-  
25 expressing cells using designer receptors exclusively activated by designer drugs (DREADDs) altered food  
26 intake and preference. Potentially underlying this effect, *Rxfp4*-expressing neurons were identified in  
27 nodose and dorsal root ganglia and the central nervous system, including the ventromedial hypothalamus  
28 (VMH). Single-cell RNA-sequencing defined a cluster of VMH *Rxfp4*-labelled cells expressing *Esr1*, *Tac1*  
29 and *Oxtr*. VMH-restricted activation of *Rxfp4*-expressing (RXFP4<sup>VMH</sup>) cells using AAV-Dq recapitulated the  
30 whole body Dq feeding phenotype. Viral tracing demonstrated RXFP4<sup>VMH</sup> neural projections to the bed  
31 nucleus of the stria terminalis, paraventricular hypothalamus, paraventricular thalamus, central nucleus  
32 of the amygdala and parabrachial nucleus. These findings identify hypothalamic RXFP4 signalling as a key  
33 regulator of food intake and preference.

34

35

## 36 Introduction

37 Relaxin/insulin-like-family peptide receptor-4 (RXFP4) is the cognate receptor for insulin-like peptide 5  
38 (INSL5), a member of the relaxin/insulin-like peptide family and can also be activated by relaxin-3<sup>1-3</sup>. The  
39 primary source of endogenous INSL5 is the distal gut, where it is co-secreted with glucagon-like peptide-  
40 1 (GLP-1) and peptide YY (PYY) from enteroendocrine L-cells<sup>4</sup>. Contrasting with GLP-1 and PYY, which  
41 exert strong anorexigenic activity, INSL5 seems to be orexigenic<sup>5</sup>. Indeed, *Rxfp4*<sup>-/-</sup> mice exhibit altered  
42 meal patterns and food preference<sup>5</sup> and central infusion of small molecular agonists of RXFP3/RXFP4  
43 increases food intake in rats<sup>6</sup>. Although the physiological role of endogenous INSL5 remains incompletely  
44 understood, RXFP4 deserves consideration as a potential target receptor for the manipulation of feeding  
45 behaviour.

46 Expression of *Rxfp4*, a G<sub>αi/o</sub>-coupled G-protein-coupled receptor (GPCR), has previously been identified in  
47 several peripheral tissues including the colon, kidney, testes, ovary, heart and liver<sup>7-9</sup>. Its role as the  
48 receptor for INSL5 was corroborated by the finding that the orexigenic activity of INSL5 was not observed  
49 in *Rxfp4* knockout mice (*Rxfp4*<sup>-/-</sup>)<sup>5</sup>. Relatively little is known, however, about the conditions that might be  
50 associated with elevated endogenous INSL5 activity. Increased plasma levels were observed in calorie-  
51 restricted mice<sup>5</sup>, albeit with the caveat that immuno-assays against endogenous INSL5 are not fully  
52 reliable<sup>10</sup>. INSL5 expression was also shown to be higher in germ-free mice and mice treated with broad-  
53 spectrum antibiotics, and suppressed by a high fat diet (HFD)<sup>11</sup>. However, *Insl5* knockout mice (*Insl5*<sup>-/-</sup>) do  
54 not display an observable feeding phenotype and in some studies pharmacological administration of INSL5  
55 (both native and PEGylated forms) failed to increase food intake in lean and obese mice<sup>11,12</sup>. Nonetheless,  
56 we recently reported a mild orexigenic effect of stimulating INSL5-positive colonic L-cells in mice, revealed  
57 upon blockade of the PYY receptor Y2R<sup>13</sup>. Furthermore, an association between *Rxfp4* polymorphisms

58 and body mass index has been demonstrated in US Caucasian individuals treated with antipsychotic drugs  
59 <sup>14</sup>.

60 In this study, we sought to identify and manipulate *Rxfp4*-expressing cells using a newly developed  
61 transgenic mouse model in which Cre-recombinase expression is driven by the *Rxfp4* promoter (*Rxfp4*-  
62 Cre). We detected *Rxfp4* expression in several nuclei in the central nervous system (CNS) previously  
63 implicated in food intake control. *Rxfp4*-expressing cells were functionally manipulated using Cre-  
64 dependent expression of designer receptors exclusively activated by designer drugs (DREADDs).  
65 Activation in all *Rxfp4*-expressing cells of a Gi-coupled DREADD (Di), which should mimic the physiology  
66 of INSL5-RXFP4 signalling, increased highly palatable food intake. Conversely, activation of a Gq-coupled  
67 DREADD (Dq) in *Rxfp4* cells resulted in reduced intake of highly palatable meals. Similar effects were seen  
68 when the ventromedial hypothalamic population of *Rxfp4*-expressing neurons was selectively targeted  
69 with rAAV-Dq. This cell population was further characterised by single-cell RNA sequencing (scRNA-seq)  
70 and projection mapping, establishing RXFP4 as a potential target for the manipulation of food preference.

71

72

73

## 74 **Results**

75 To investigate a possible role of *Rxfp4*-expressing cells in feeding control, we generated a new BAC  
76 transgenic mouse (*Rxfp4*-Cre) model in which Cre-recombinase is expressed under the control of the  
77 *Rxfp4*-promoter (Fig. 1a). By crossing *Rxfp4*-Cre mice with fluorescent protein reporter mice (e.g. Rosa26  
78 fxSTOPfx-EYFP (RXFP4<sup>EYFP</sup>)) (Fig. 1b) we observed *Rxfp4* dependent expression in the colon (Fig 1c),  
79 consistent with previous reports, however, expression seemed restricted to enteroendocrine cells,  
80 particularly serotonin producing enterochromaffin (EC)-cells (Suppl. Fig. 1a), rather than, as previously  
81 suggested <sup>5</sup>, enteric neurons (Suppl. Fig.1d). We observed *Rxfp4*-expression in vagal and spinal afferent  
82 neurons in nodose and dorsal root ganglia (DRG) (Suppl. Fig. 1e,f), and readily detected reporter  
83 expression in the central nervous system (CNS) (Suppl. Fig. 2). Within the CNS we observed reporter  
84 expression in the accessory olfactory bulb, septofimbrial nucleus, retrosplenial cortex and the mammillary  
85 body medial and lateral parts, as well as in a lower density of cells in the substantia innominata, cortical  
86 and central amygdala, periaqueductal grey, and spinal trigeminal tract of the hindbrain (Suppl. Fig 2).  
87 Examination of RXFP4<sup>GCaMP3</sup> mice clearly revealed transgene expression in the ventrolateral part of the  
88 ventromedial hypothalamus (VMHvl) extending into the adjacent tuberal nucleus (TN) (Fig. 1d,e), despite  
89 our previously reported failure to amplify *Rxfp4* from hypothalamic cDNA by RT-PCR <sup>5</sup>. In the VMHvl, co-  
90 staining with NeuN demonstrated GFP expression in mature RXFP4 positive neurons (Fig. 1f). Active  
91 transcription of *Rxfp4* mRNA in the adult mouse hypothalamus was confirmed by RNAscope (Fig.1g,h) and  
92 RT-qPCR (Suppl. Fig. 1i).

93 Given the observed peripheral and central neuronal expression of *Rxfp4* and the previously reported  
94 altered feeding patterns and macronutrient preferences in *Rxfp4* knock-out mice <sup>5</sup>, we investigated the  
95 effects of DREADD activation in *Rxfp4*-expressing cells. Initially we used a whole-body hM4Di Cre-reporter  
96 (RXFP4<sup>wb-Di</sup>) to mimic the established RXFP4-signalling via pertussis-toxin sensitive Gi pathways <sup>2</sup> (Fig. 2a).

97 During the light phase, activation of Di in *Rxfp4*-expressing cells using CNO had no measurable effect on  
98 food intake in mice eating standard chow (Fig. 2b). However, when animals were adapted to the  
99 appearance of a high fat diet (HFD) or a highly palatable liquid Ensure test meal (HPM), during the light  
100 phase, CNO application resulted in increased food intake (Fig. 2c,d). To investigate this further, we gave  
101 mice housed in metabolic cages the choice between standard chow and HFD. CNO injection during the  
102 light phase significantly increased HFD but not chow intake in RXFP4<sup>wb-Di</sup> mice (Fig. 2e). This effect was  
103 transient (Fig. 2f), consistent with the pharmacokinetics of CNO<sup>15</sup>, and occurred without any significant  
104 differences in ambulatory activity or energy expenditure compared to the saline cross-over control (Suppl.  
105 Fig. 3a,b).

106 We next investigated the effects of whole-body hM3Dq Cre-reporter activation in *Rxfp4*-expressing cells  
107 (RXFP4<sup>wb-Dq</sup>) (Fig. 3a). Similar to the results in RXFP4<sup>wb-Di</sup> mice, activation of Dq in *Rxfp4*-expressing cells  
108 with CNO had no measurable effect on ad lib fed mice offered a standard chow, which was tested at the  
109 onset of the dark phase when mice are normally highly motivated to feed (Fig. 3b). However, when  
110 RXFP4<sup>wb-Dq</sup> animals were adapted to the appearance of HFD or a HPM at the onset of the dark phase,  
111 activation of Dq expressing cells with CNO resulted in a marked reduction in food intake (Fig 3. c,d). These  
112 results were consolidated in ad lib fed animals in metabolic cages with parallel access to standard chow  
113 and HFD. RXFP4<sup>wb-Dq</sup> activation in ad lib fed animals at the onset of the dark phase, had no effect on  
114 standard chow intake, but significantly and transiently reduced HFD consumption (Fig 3. e,f). RXFP4<sup>wb-Dq</sup>  
115 activation also attenuated the increase in energy expenditure associated with the onset of the dark phase,  
116 however, there was no effect on ambulatory activity (Suppl. Fig. 3c,d).

117 To probe whether *Rxfp4*-expressing cells play a role in the motivational aspects of feeding, we calorically  
118 restricted male RXFP4<sup>wb-Dq</sup> animals to 95% body weight and placed them in operant chambers. Mice were  
119 either tested with a fixed ratio (FR) schedule, requiring 5 nose pokes to release a food reward, or a

120 progressive ratio (PR) schedule requiring increasing number of nose pokes for each subsequently earned  
121 reward (in this case, +4, i.e. 1, 5, 9, 13, etc). RFXFP4<sup>wb-Dq</sup> mice treated with CNO completed fewer attempts  
122 under FR to earn individual Ensure meals/rewards (Fig. 3g). Under a PR schedule, they exhibited a reduced  
123 breakpoint – i.e. CNO-treated mice stopped working for the HPM-reward at lower ratios than when  
124 receiving vehicle treatment (Fig. 3h). In an effort related choice (ERC) paradigm, where animals had the  
125 choice of working for a HPM (FR8, liquid Ensure) or consuming freely available standard chow, CNO  
126 treatment reduced HPM consumption (Fig. 3i). However, animals consumed similar amounts of standard  
127 chow and displayed otherwise normal behaviour (supplementary video 1), suggesting that activation of  
128 *Rxfp4*-expressing cells reduced motivation for the HPM rather than inducing generalised malaise.

129 *Rxfp4*-expressing cells were identified in the VMHvl (Fig. 1d,e), a central hub for the regulation of energy  
130 balance and integration of diverse nutritionally regulated hormonal and synaptic inputs, as well as in the  
131 adjacent TN previously implicated in feeding behaviour<sup>16, 17</sup>. To assess whether this *Rxfp4*-expressing  
132 population is involved in the feeding phenotype observed in RFXFP4<sup>wb-Dq</sup> mice, the effect of acute  
133 chemogenetic manipulation of *Rxfp4*-expressing VMHvl cell activity on food intake was investigated. Male  
134 *Rxfp4*-Cre mice received bilateral VMHvl injections of Cre-dependent hM3Dq-expressing rAAVs (AAV-  
135 hSyn-DIO-hM3D(G)q-mCherry) designed to preferentially target neurons, to produce RFXFP4<sup>VMHDq</sup> mice  
136 (Fig. 4a). Targeting efficiency was subsequently determined by immunohistochemistry (Fig. 4b). All  
137 included mice demonstrated robust transduction that was limited to the target region; one mouse, due  
138 to misplacement of the cannula and subsequent infusion, demonstrated off-target expression i.e.,  
139 expression outside the VMHvl. This mouse was excluded from the analysis. The effect of chemogenetic  
140 activation of this cell population on food intake was studied in a crossover design. In chow fed mice, and  
141 in line with RFXFP4<sup>wb-Dq</sup> animals, CNO treatment of RFXFP4<sup>VMHDq</sup> mice had no effect on standard chow intake  
142 at the onset of the dark phase (Fig. 4c). When animals were habituated to the appearance of a HFD or  
143 HPM at the onset of the dark phase, CNO resulted in a significant reduction in food intake (Fig. 4d,e).

144 When offered HFD and chow diet in parallel in metabolic cages, CNO significantly reduced intake of the  
145 HFD whilst intake of standard chow was not altered, resulting in an overall reduced caloric intake (Fig. 4f).  
146 As seen with RXFP4<sup>wb-Dq</sup> animals, this was a transient effect, which was no longer apparent 2 hours post  
147 administration of CNO (Fig. 4g). CNO had no effect on energy expenditure or ambulatory activity in these  
148 RXFP4<sup>VMHDq</sup> animals (Suppl. Fig. 3e,f). RXFP4<sup>VMHDq</sup> mice were subsequently offered water and 2% sucrose  
149 in parallel in metabolic cages, and although animals preferentially consumed 2% sucrose, CNO did not  
150 affect intake (Suppl. Fig. 4a,b).

151 We subsequently generated a single cell resolution transcriptomic profile of *Rxfp4*-expressing cells in the  
152 hypothalamus. Fluorescent cell populations from the hypothalamus of RXFP4<sup>EYFP</sup> mice were purified by  
153 FACS and their transcriptomes analysed by scRNA-Seq. Graph-based clustering analysis revealed that  
154 hypothalamic *Rxfp4*-expressing cells separate into five populations (Fig. 5a). Cluster identities were  
155 assigned based on the expression patterns of canonical cell-type markers, with macrophages (*Mrc1*,  
156 *Mgl2*), microglia (*Tmem119*, *Siglech*, *P2ry12*), neuronal cells (*Snap25*, *Tubb3*, *Elavl2*), ependymocytes  
157 (*Ccdc153*, *Hdc*) and endothelial cells (*Dcn*, *Hspg2*) representing distinct clusters (Fig. 5b). As hypothalamic  
158 neurons are known to modulate feeding behaviour, we analysed the neuronal cluster in more detail,  
159 identifying seven subclusters (Fig. 5c). *Rxfp4*-positive neurons expressed markers for both GABAergic  
160 (*Slc32a1*) and glutamatergic (*Slc17a6*) cells (Fig 5d). Cluster 1 was enriched in markers previously  
161 associated with an estrogen receptor (*Esr1*)-positive VMHvl neuronal population<sup>18, 19</sup>, including  
162 preprotachykinin-1 (*Tac-1*), oxytocin receptor (*Oxtr*), cholecystokinin receptor A (*Cckar*), melanocortin 4  
163 receptor (*Mc4r*) and neuromedin U receptor 2 (*Nmur2*) (Fig 5d), suggesting crosstalk with known food  
164 regulatory networks. Receptors for other established feeding-neuromodulators, like glucagon-like  
165 peptide-1 receptor (*Glp1r*) and cholecystokinin receptor B (*Cckbr*), were preferentially expressed in cluster  
166 6 (Fig 5d).



167 Finally, we aimed to establish the neuronal circuitry surrounding *Rxfp4*-expressing cells in the VMHvl. We  
168 performed viral anterograde and retrograde projection mapping by stereotactically injecting Cre-  
169 dependent AAV8-ChR2-mCherry<sup>20</sup> and AVV2-TVAeGFP-oG/ Rab-ΔG-EnvA-mCherry<sup>21</sup>, respectively into  
170 the VMH of *Rxfp4*-Cre mice. The anterograde axonal transport of the ChR2-mCherry fusion revealed  
171 robust RXFP4<sup>VMH</sup> projections to multiple regions including the bed nucleus of the stria terminalis (BNST),  
172 preoptic area (POA) and anteroventral periventricular nucleus (AVPV), arcuate nucleus (ARC),  
173 paraventricular hypothalamus (PVH), central nucleus of the amygdala (CeA), periaqueductal gray (PAG,  
174 dorsomedial and lateral) and lateral parabrachial nucleus (LPBN) (Fig. 6a-c, Suppl. Fig. 6). The retrograde  
175 monosynaptic transport of Rab-mCherry labelled inputs from several nuclei established in feeding  
176 regulation, including the ARC and PVH (Fig. 6d-f). The neuronal circuitry surrounding *Rxfp4*-expressing  
177 cells is summarised in Fig. 6g.

178

179

180 **Discussion**

181 The *Rxfp4*-Cre mouse model generated in this study has enabled the identification of peripheral and  
182 central *Rxpf4*-expressing cells, and aided the transcriptomic, functional and anatomical characterisation  
183 of a hypothalamic *Rxfp4*-expressing neuronal population. We show that *Rxfp4* is expressed in key feeding  
184 centres of the brain, including neurons of the VMHvl. Chemogenetic activation of this population  
185 suppressed HFD and HPM intake, reflecting their position in brain circuits previously implicated in  
186 homeostatic and hedonic regulation of food intake. These data identify hypothalamic RXFP4 signalling as  
187 a key regulator of food intake and preference.

188 *Rxfp4* expression has been difficult to localise due to seemingly low mRNA expression levels and the lack  
189 of suitable verified antibodies. *Rxfp4* expression has previously been reported in the colon <sup>5</sup> and in  
190 enteroendocrine tumor cell lines <sup>22, 23</sup> and here we demonstrate *Rxfp4*-reporter expression in  
191 enterochromaffin (EC)-cells by immunohistochemistry (Suppl. Fig. 1a). Consistent with EC-expression,  
192 FACS sorted colonic RXFP4<sup>EYFP</sup> cells were enriched for *Tph1* mRNA, the first enzyme in the serotonin  
193 biosynthesis pathway and for *Rxfp4* itself, confirming active receptor transcription (Suppl. Fig. 1b,c).  
194 Although previous *in situ* hybridization suggested expression in the enteric nervous system (ENS) <sup>5</sup>, we did  
195 not observe reporter expression in enteric neurons, but were able to detect expression in afferent  
196 neurons innervating the colon. We also did not detect *Rxfp4*-reporter expression in the endocrine  
197 pancreas (Suppl. Fig. 1g,h), suggesting RXFP4 is unlikely to play a physiological relevant role in pancreatic  
198 hormone secretion. This contradicts reports of INSL5 stimulating insulin secretion <sup>24</sup>, but is in keeping with  
199 a lack of *Rxfp4* mRNA detection in mouse pancreatic islet cells <sup>25</sup> and our failure to observe any effect of  
200 CNO on glucose tolerance in lean and diet-induced obese RXFP4<sup>wb-Dq</sup> and RXFP4<sup>wb-Di</sup> mice (Suppl. Fig. 7).  
201 In contrast to our previous report <sup>5</sup>, we detected *Rxfp4* mRNA in the hypothalamus (Suppl. Fig. 1i) and  
202 found substantial reporter expression in multiple brain regions with distinct *Rxfp4*-expressing cell  
203 populations in the accessory olfactory bulb, RSC, VMHvl, and mammillary body (Fig. 1d, Suppl. Fig. 2). This

204 could, in principle, be lineage tracing events from precursor cells. However, the activation of Cre-reporter  
205 rAAV-constructs when stereotactically injected into the adult VMH is consistent with active *Rxfp4*-  
206 promoter activity driving *Cre*-expression, and the detection of *Rxfp4* mRNA by RT-qPCR and RNAscope  
207 further consolidate active *Rxfp4* expression in the adult mouse brain (Fig. 1g,h, Suppl. Fig. 1i).

208 Inhibition of *Rxfp4*-expressing cells via Di acutely increased intake of both a HFD and a HPM in the home  
209 cage and when animals were offered a choice of standard laboratory chow and HFD in metabolic cages,  
210 without altering energy expenditure and activity in both male and female mice (Fig 2, Suppl. Fig 3a,b). This  
211 is consistent with our previous demonstration that INSL5 administration increased food intake <sup>5, 13</sup>, as  
212 activation of Di receptors should at least in part mimic the  $G\alpha_{i/o}$  coupling of RXFP4 <sup>2</sup>. Other relaxin family  
213 peptide receptors have also been implicated in energy homeostasis, with dual agonists of RXFP3/4  
214 increasing food intake in rats following acute central administration <sup>6</sup>. The increase in food intake  
215 observed in RXFP4<sup>wb-Di</sup> mice was, however, modest and more subtle than that reported for AGRP<sup>Dq</sup>  
216 animals, which showed, at least transiently, a phenotype even on standard chow <sup>26</sup>.

217 Activation rather than inhibition of *Rxfp4*-expressing neurons with Dq produced a robust and reproducible  
218 suppression of food intake. We particularly focused on a central *Rxfp4*-expressing population in the  
219 VMHvl, which is a region previously implicated in feeding and energy expenditure <sup>16, 17</sup>. However, the  
220 adjacent TN, which has also been implicated in feeding behaviour <sup>17</sup>, may have also been targeted during  
221 stereotactic injections, as disparities between current mouse brain atlases on the exact location of the TN  
222 make it difficult to distinguish from the VMHvl. The *Rxfp4*-expressing population we targeted is therefore  
223 best described as RXFP4<sup>VMH</sup>. Targeting this population with an rAAV-Dq reporter recapitulated the findings  
224 with the whole body-Dq reporter (Fig. 4). Whilst any of the identified *Rxfp4*-expression sites could  
225 participate in the feeding phenotype of the global DREADD reporter mice, the VMH-selective rAAV-Dq  
226 reporter phenotype indicates that this hypothalamic population is at least in part underlying the observed

227 anorexigenic effects in the *RXFP4*<sup>wb-Dq</sup> model. However, an additional peripheral signalling pathway  
228 involving afferent sensory fibres cannot be excluded, given the robust *Rxfp4* mRNA expression and  
229 labelling in *RXFP4*<sup>EYFP</sup> mice in somata located in dorsal root and nodose ganglia.

230 Our data suggest that activation of *Rxfp4*-expressing cells in the VMH suppresses the consumption and  
231 drive to work for calorie dense HFD and HPM food. The importance of the VMH in the regulation of feeding  
232 and metabolism has been disputed (reviewed in <sup>27</sup>). Initial studies suggested the VMH might be a “satiety  
233 centre”, as VMH-lesioned rats, particularly females, over-consumed when fed ad libitum <sup>28</sup>, despite being  
234 seemingly less willing to work for food on a fixed ratio lever-pressing paradigm <sup>29</sup>. The observed  
235 hyperphagia has subsequently, however, been linked to additional damage to adjacent hypothalamic  
236 structures (see King 2006<sup>27</sup> for discussion), whilst the reduced motivation was not observed when rats  
237 were trained pre-operatively, suggesting that the VMH lesion altered the “trainability” rather than feeding  
238 motivation <sup>27, 30</sup>. Lesioning studies, whilst informative, lack cellular precision and damage neural  
239 connections to other feeding centres within the brain. More recent work employing  
240 immunohistochemistry, RNA sequencing, chemogenetic techniques and neuronal projection mapping,  
241 has demonstrated that the VMH consists of anatomical subdivisions made up of heterogeneous but  
242 distinct cell populations<sup>18, 31, 32</sup>. Functional studies suggest neurons in the central and dorsomedial VMH  
243 regulate feeding, energy expenditure and glucose homeostasis <sup>33, 34</sup>, while the VMHvl is more frequently  
244 implicated in the control of social and sexual behaviours<sup>32, 35, 36</sup>. However, several studies have  
245 demonstrated the involvement of VMHvl neurons in energy expenditure and feeding behaviour <sup>16, 37</sup>.  
246 Increases in physical activity have been observed following chemogenetic activation of NK2 homeobox  
247 transcription factor 1 (*Nkx2-1*)-expressing neurons in the VMHvl of female rats, while knockout of *Nkx2-1*  
248 in the VMHvl leads to decreased physical activity and thermogenesis <sup>38</sup>. Furthermore, chemogenetic  
249 activation of *Esr1*-expressing VMHvl neurons was found to stimulate physical activity and thermogenesis  
250 in both sexes <sup>19</sup>. *Esr1* signalling in the VMHvl was previously demonstrated to influence food intake, energy

251 expenditure and glucose tolerance as VMHvl-restricted knockdown of *Esr1* resulted in increased food  
252 intake, decreased physical activity and thermogenesis, reduced glucose tolerance and obesity in female  
253 rats<sup>16</sup>. By contrast, activation of *Rxfp4*-expressing cells in the VMHvl in RXFP4<sup>VMHDq</sup> mice reduced HFD and  
254 HPM intake but had no effect on chow intake, energy expenditure or ambulatory activity (Fig. 4, Suppl.  
255 Fig. 3e,f). This suggests that *Rxfp4*-expressing neurons comprise a unique VMHvl population modulating  
256 the rewarding aspects of food rather than the homeostatic food intake or energy expenditure responses  
257 observed during chemogenetic manipulation of other VMHvl populations.

258 To identify whether hypothalamic *Rxfp4*-expressing cells could be assigned to known neural networks we  
259 performed scRNA-Seq which revealed substantial cellular heterogeneity. Although some cells will have  
260 been lost and some genes may have exhibited altered expression during the cell dissociation and sorting  
261 process, the results allowed us to cluster *Rxfp4*-expressing cells into several subpopulations each  
262 characterised by a profile of canonical cell-type marker genes (Fig. 5a,b). Our identification of *Rxfp4* in  
263 microglia, ependymocytes and endothelial cells that potentially constitute the blood brain barrier, raises  
264 the possibility that INSL5 may exert effects on non-neuronal cells<sup>39</sup>. Clustering of the *Rxfp4*-expressing  
265 neuronal population illustrated a predominance of glutamatergic neurons with few GABAergic clusters  
266 (Fig 5d). Cluster 6 is of note given the expression of *Glp1r*, *Cckbr*, *Sstr1* and *Sstr2*, suggesting an overlap  
267 with other known appetite-modulating gut peptide receptors. The cocaine- and amphetamine-regulated  
268 transcript (*Cartpt*), expressed in cluster 3, and cannabinoid receptor 1 (*Cnr1*), expressed in clusters 1, 4  
269 and 5, (Suppl. Fig. 5) are also implicated in energy homeostasis<sup>40,41</sup>. Cluster 1 displays markers of a VMHvl  
270 *Esr1* population (*Esr1*, *Pgr*, *Tac1*, *Cckar*, *Rprm* and *Oxtr*) previously associated with food intake and energy  
271 expenditure<sup>16, 18, 19</sup>. Whilst there is clearly co-expression of *Rxfp4* and *Esr1* expression in the VMHvl,  
272 chemogenetic activation of RXFP4<sup>VMHDq</sup> neurons did not result in increased energy expenditure or  
273 ambulatory activity, contrasting with the described *Esr1*<sup>VMHDq</sup> phenotype<sup>19</sup>. An important role of VMHvl  
274 *Rxfp4*-expressing cells in feeding regulation is further suggested by the co-expression of the neuropeptide

275 receptors *Mc4r* and *Nmur2*. MC4R activation has been linked to suppressed food intake through  
276 regulation of *Bdnf* expression in the VMH<sup>42</sup> – *Bdnf* is co-expressed in cluster 1 neurons in our dataset (Fig.  
277 5d). Acute administration of NMUR2 agonists have been shown to decrease feeding, with one agonist  
278 being somewhat selective to HFD intake regulation<sup>43</sup>, mirroring RXFP4<sup>VMHDq</sup> cell activation (Fig 4). scRNA-  
279 Seq has previously revealed heterogeneous VMHvl neuronal populations which can be broadly  
280 categorised into three subdivisions based on the expression of *Esr1*, *Dlk1* (Delta-like homolog 1) or *Satb2*  
281<sup>18</sup>. In accordance with this dataset, we identified *Esr1* in cluster 1, as described above, and we also  
282 observed *Dlk1* expression in the GABAergic clusters 4 and 5 (Fig. 5d). These clusters may reflect VMHvl  
283 *Dlk1* expression as observed by Kim et al., but may also indicate other hypothalamic *Rxfp4*-expressing  
284 neurons given the relatively widespread expression of *Dlk1* in the hypothalamus. The role of hypothalamic  
285 *Dlk1* expression in energy homeostasis has not been functionally explored, however this gene has been  
286 implicated in obesity in mice and humans<sup>44,45</sup>. We detected very low levels of *Satb2* in our hypothalamic  
287 *Rxfp4*-expressing cells (Suppl. Fig. 4) suggesting limited overlap between *Rxfp4* and *Satb2* populations.

288 Mapping of the retrograde inputs to and anterograde projections from RXFP4<sup>VMH</sup> cells revealed a distinct  
289 neural circuitry surrounding this hypothalamic population. Monosynaptic inputs were labelled  
290 predominantly from brain regions involved in homeostatic regulation of food intake such as the ARC, PVH  
291 and LHA (Fig. 6f). Within the ARC, two populations of neurons have been intensely studied with regards  
292 to feeding regulation: pro-opiomelanocortin (POMC)/cocaine- and amphetamine-regulated transcript  
293 (CART)-expressing neurons inhibit food intake while Agouti-Related Peptide (AgRP)/neuropeptide Y (NPY)-  
294 expressing neurons stimulate food intake. These neurons integrate nutritional and hormonal signals from  
295 the periphery, detected due to the leaky blood brain barrier in the adjacent median eminence, and send  
296 projections to multiple brain regions including the VMH<sup>46</sup>. Given the co-expression of *Mc4r* in the  
297 RXFP4<sup>VMHvl</sup> neurons it seems likely that POMC neurons are part of this ARC innervation of RXFP4<sup>VMHvl</sup>  
298 neurons, even though the VMH is not thought to be the main target of arcuate POMC projections<sup>47</sup>.

299 RXFP4<sup>VMH</sup> cells predominantly project onto regions associated with reward and motivation-related  
300 behaviours (Fig. 6c, Suppl. Fig. 6) such as the BNST, POA, CeA, paraventricular thalamic nucleus (PVT) and  
301 ventral tegmental area (VTA)<sup>48-50</sup>, potentially underlying our finding that chemogenetic activation of  
302 *Rxfp4*-expressing cells in RXFP4<sup>wb-Dq</sup> mice reduced an animal's drive to seek out and work for a highly  
303 palatable food reward (Fig 3g-i). Taken together, these data suggest that *Rxfp4*-expressing cells influence  
304 motivation and reward-related behaviour, potentially via regulation of central reward signalling pathways.  
305 RXFP4<sup>VMH</sup> cells also send projections to the PAG and LPBN, two integration sites responsible for relaying  
306 sensory information between the forebrain and hindbrain and coordinating behaviour in response to  
307 various stimuli including metabolic, gustatory and nociceptive inputs<sup>51-53</sup>. This RXFP4<sup>VMH</sup> projection map  
308 aligns with previously identified projection regions from the VMHvl and SST-expressing cells in the TN<sup>17</sup>,  
309<sup>54</sup>. Given the difficulty in defining the boundary between the VMHvl and TN, it is possible that some *Rxfp4*-  
310 expressing cells in the TN were transfected by the viral vectors and acted as starter cells in these tracing  
311 experiments. Interestingly, all retrograde-labelled input regions also received projections from RXFP4<sup>VMH</sup>  
312 cells suggesting a high level of bidirectional connectivity within the RXFP4<sup>VMH</sup> signalling network (Fig. 6g).  
313 Similar bidirectional connectivity has been shown for an *Esr1*+ve VMHvl population<sup>54</sup>. The RXFP4<sup>VMH</sup>  
314 neural network established in this study suggests these cells may integrate metabolic and nutritional cues  
315 either directly or via other hypothalamic regions and regulate the reward system to influence ingestive  
316 behaviours. The low number of RXFP4<sup>VMH</sup> input regions compared to projection regions suggests these  
317 cells may comprise an early node in this network.

318 We recognise several limitations to this study. First, the exact classification of *Rxfp4*-expressing brain  
319 regions is difficult given the disparities between current brain atlases. We defined an *Rxfp4*-expressing  
320 population in the VMHvl based on anatomical location and mRNA expression profile. However, the inexact  
321 nature of stereotactic injections may have resulted in additional targeting of neurons in adjacent LHA and  
322 TN regions, which may have contributed to the food intake phenotype of RXFP4<sup>VMHDq</sup> mice. Although we

323 have shown that chemogenetic manipulation of *Rxfp4*-expressing cells regulates food intake and food  
324 preference, this technique may trigger supraphysiological responses in target cells, so we cannot conclude  
325 that similar changes in food intake behaviour would be triggered by physiological activation of RXFP4. The  
326 VMHvl is also a sexually dimorphic brain region with activation of different subpopulations giving  
327 divergent responses in males and females <sup>37, 38</sup>. While the operant conditioning and RXFP4<sup>VMHDq</sup>  
328 experiments in the present study were only conducted in males, we did not observe sex differences in  
329 *Rxfp4*-Cre reporter expression profiles, whole body DREADD activation phenotypes or in RXFP4<sup>VMH</sup>  
330 projection mapping, so we do not believe RXFP4 action to be strongly sexually dimorphic. We also cannot  
331 be certain whether endogenous INSL5 acts on *Rxfp4*-expressing cells in the brain to regulate central RXFP4  
332 activity. We have previously been unable to identify *Ins15*-expressing cells in the mouse brain <sup>13</sup> and there  
333 is no evidence that INSL5 can cross the blood brain barrier. However, relaxin-3 also activates RXFP4 <sup>2</sup>, is  
334 expressed in the mouse brain and is orexigenic <sup>55</sup>, hence it is possible that relaxin-3, rather than INSL5, is  
335 involved in central RXFP4 action. This study has illustrated the neuronal network of RXFP4<sup>VMH</sup> cells using  
336 viral tracing techniques which have some limitations. In the retrograde tracing experiments, it was difficult  
337 to detect AAV-GFP immunoreactive cells, making it hard to confirm the exact starter cells in this  
338 experiment. Although mCherry-positive cell bodies identified in the adjacent regions, ARC and DMH, could  
339 theoretically be starter cells rather than input regions, this seems unlikely based on the small volume of  
340 virus injected. Furthermore, while the ChR2-mCherry construct is preferentially targeted to axon  
341 terminals, it is possible that some of the mCherry-labelled fibres in adjacent regions, such as the ARC, are  
342 in fact dendrites <sup>56</sup> which may underlie our inability to detect retrograde-only labelled regions. Finally, in  
343 these tracing experiments we did not detect projections to regions very far from the target region, such  
344 as in the hindbrain. This may reflect a lack of very long-range projections from *Rxfp4*-expressing neurons  
345 but may also be due to a low concentration of ChR2-mCherry in axon terminals very far from the cell body  
346 <sup>56</sup>. Nevertheless, we have been able to identify distinct regions that project onto and receive projections



347 from *Rxfp4*-expressing cells in the VMH that connect these cells to known feeding-related neural  
348 networks.

349 In summary, we have characterised a previously unrecognised population of ventromedial hypothalamic  
350 cells that express *Rxfp4* in mice, demonstrated that their acute activation in males reduces HFD/HPM  
351 intake without affecting chow intake or changes in energy expenditure, and identified projections in  
352 homeostatic and hedonic feeding centres in the CNS. Together, these findings suggest *Rxfp4*-expressing  
353 VMHvl-neurons are key modulators of food preference.

354

## 355 **Methods**

### 356 **Animals**

357  
358 All experiments were performed under the UK Home Office project licences 70/7824 and PE50F6065 in  
359 accordance with the UK Animals (Scientific Procedures) Act, 1986 and approved by the University of  
360 Cambridge Animal Welfare and Ethical Review Body. All mice were from a C57BL/6 background and were  
361 group-housed and maintained in individual ventilated cages with standard bedding and enrichment in a  
362 temperature and humidity controlled room on a 12h light:dark cycle (lights on 7:00) with ad libitum (ad  
363 lib) access to food (Scientific Animal Food Engineering) and water unless otherwise stated. Groups were  
364 randomised by body weight and the researcher was blinded to treatment.

365

### 366 **Mouse models**

367 To express Cre recombinase under the control of the *Rxfp4* promoter, we replaced the sequence between  
368 the start codon and the stop codon in the single coding exon of *Rxfp4* in the murine-based BAC RP24-7214  
369 (Children's Hospital Oakland Research Institute) with iCre<sup>57</sup> sequence using Red/ET recombination  
370 technology (GeneBridges) (Fig 1A). The resulting BAC was used to create BAC-transgenic mice – of four  
371 initial founders, two passed the transgene to their offspring; both resulting lines showed similar Cre-

372 reporter expression and one line, *Rxfp4-73*, was used throughout this manuscript (see Suppl. methods 1  
373 for further information). Several Cre-reporter transgenes, in which expression is only activated after  
374 removal of a *fxSTOPfx* cassette, were used, resulting in expression of EYFP<sup>58</sup>, Dq, Di<sup>59</sup>, GCaMP3<sup>60</sup>, or  
375 tdRFP<sup>61</sup>, respectively.

### 376 **Viral injections**

377 Viral injections were performed in male and female *Rxfp4*-Cre mice aged between 9 and 16 weeks. The  
378 surgical procedure was performed under isoflurane, with all animals receiving Metacam prior to surgery.  
379 Mice were stereotactically implanted with a guide cannula (Plastics One) positioned 1mm above the VMH  
380 (A/P: -1.7 mm, D/V: -4.5 mm, M/L: +/- 0.75 mm from bregma). Bevelled stainless steel injectors (33 gauge,  
381 Plastics One) extending 1mm from the tip of the guide were used for injections. For phenotyping  
382 experiments, 200nL AAV-hM3D(G)q-mCherry (Addgene 44361-AAV8,  $4 \times 10^{12}$  vg/mL) was injected  
383 bilaterally at 50nl/min and mice were allowed 2 weeks recovery prior to testing. For anterograde viral  
384 tracing experiments, 200 nL AAV-DIO-ChR2-mCherry (Addgene, 20297-AAV8,  $1.9 \times 10^{13}$  vg/ml) was  
385 injected unilaterally at 75 nL/min. Mice were culled three weeks after injection. For retrograde viral  
386 tracing experiments, AVV2-FLEX-TVAeGFP-2A-oG (AAV2-TVAeGFP-oG) and Rabies- $\Delta$ G-EnvA-mCherry  
387 (Rab- $\Delta$ G-EnvA-mCherry) viruses were generated by Ernesto Ciabatti (MRC Laboratory of Molecular  
388 Biology, Cambridge). Mice were injected unilaterally with 200 nL AVV2-TVAeGFP-oG ( $1 \times 10^{12}$  vg/mL) at 75  
389 nL/min followed by 500 nL Rab- $\Delta$ G-EnvA-mCherry ( $2 \times 10^9$  iu/mL) at 75 nL/min three weeks later. Mice  
390 were culled seven days after the second injection.

391

### 392 **Food intake**

393 Food intake studies were performed in a cross-over manner, on age-matched groups, a minimum of 72  
394 hours apart. For experiments assessing the effect of global RXFP4 Di and Dq activation, animals were singly  
395 housed prior to the experiment. Mice were administered 1mg/kg CNO (Sigma) or an equivalent volume

396 of vehicle containing a matched concentration of DMSO. For light phase activation, animals were injected  
397 with vehicle or CNO at 11:00 ( $\pm$  30mins) following a 2h fast. Food was weighed at 1h post-injection. For  
398 dark phase activation, animals were injected with vehicle or CNO at 19:00 at the onset of the dark phase  
399 following a 2h fast. Food was weighed at 1h post-injection. In trials with a high fat diet (HFD) and a highly  
400 palatable meal (HPM, liquid Ensure, Abbott Laboratories, 353-3601), mice were habituated to the  
401 appearance of the test meal (5 days per week) for two weeks prior to testing.

402

### 403 **Operant chambers**

404 Twelve male RFXFP4<sup>wb-Dq</sup> mice (weighed 3 times weekly) were food restricted to maintain 95% body weight  
405 for two weeks prior to training and testing in standard mouse Bussey-Saksida touchscreen chambers  
406 (Campden Instruments Ltd, Loughborough, UK). Training and testing procedures were conducted as  
407 previously described<sup>62</sup>. Briefly, mice were trained to touchscreen for reward (the HPM, 20  $\mu$ L) under a  
408 fixed ratio (FR) schedule for 2 weeks, progressing from FR1 to FR5 (training deemed successful when  
409 animal earned 30 rewards within 1 hour), followed by testing. Mice then progressed to progressive ratio  
410 (PR, increment +4 i.e. 1, 5, 9, 13, etc), where the breakpoint was defined as the last reward earned before  
411 5 minutes elapsed without operant response. Following testing of the breakpoint, mice progressed to the  
412 effort related choice schedule (ERC) - mice were trained on FR8, with the addition of standard chow to  
413 the operant arena. Once animals successfully earned 30 rewards within 60 minutes, testing was  
414 undertaken. The 60-minute training and testing sessions took place at the same time each day (between  
415 10:00-13:00).

416

### 417 **Metabolic cages**

418 Animals were acclimated to metabolic cages prior to study and data collection. Oxygen consumption and  
419 carbon dioxide production were determined using an indirect calorimetry system (Promethion, Sable

420 Systems, Las Vegas, NV). The system consisted of 8 metabolic cages (similar to home cages), equipped  
421 with water bottles and food hoppers connected to load cells for continuous monitoring housed in a  
422 temperature and humidity-controlled cabinet. The respiratory exchange ratio (RER) and energy  
423 expenditure (via the Weir equation) were calculated, whilst ambulatory activity was determined  
424 simultaneously. Raw data was processed using ExpeData (Sable Systems). Animals were exposed to  
425 standard chow and a HFD during metabolic assessment or standard chow, water and 2% sucrose for  
426 sucrose preference.

427

#### 428 **Immunohistochemistry**

429 Colonic, pancreatic, enteric, nodose and dorsal root ganglia tissues were fixed in 4% paraformaldehyde  
430 (PFA), dehydrated in 15% and 30% sucrose, and frozen in OCT embedding media (CellPath, Newtown,  
431 U.K.). Cryostat-cut sections (8-10 $\mu$ m) were mounted directly onto poly-L-lysine-covered glass slides (VWR,  
432 Leuven, Belgium) by the Institute of Metabolic Science Histology Core, except for nodose and dorsal root  
433 ganglia, which were cryosectioned at 6 $\mu$ m. Slides were incubated for 1hr in blocking solution containing  
434 10% goat or donkey serum. Slides were stained overnight at 4°C with primary antisera (table 1) in  
435 PBS/0.05% Triton X-100/10 % serum. Slides were washed with blocking solution and incubated with  
436 appropriate secondary antisera (donkey or goat Alexa Fluor® 488, 546, 555, 633 or 647; Invitrogen) diluted  
437 1:400 and Hoechst diluted 1:1500 for 1 hr. Control sections were stained with secondary antisera alone.  
438 Sections were mounted with Prolong Gold (Life Technologies) or hydromount (National Diagnostics,  
439 Atlanta, Georgia, USA) prior to confocal microscopy (Leica TCS SP8 X, Wetzlar, Germany). Quantification  
440 of cell number was performed using Leica Application Suite X and Image J.

441 Brain tissue was collected from perfusion fixed mice as previously described<sup>63</sup>. Animals were  
442 anaesthetised with dolethal sodium pentobarbital solution at 125 mg/kg ip (in saline) and transcardially

443 perfused with heparinised 0.1M phosphate buffered saline (1xPBS) followed by 4% PFA in PBS. Brains  
444 were extracted and post-fixed in 4% PFA for 24 hrs at 4°C then transferred to 30% sucrose solution at 4°C  
445 for 48 hrs. Brains were sectioned coronally from olfactory bulb to the spinomedullary junction at 25 µm  
446 using a freezing microtome and stored in cryoprotectant medium. For diaminobenzidine (DAB) staining,  
447 antigen retrieval was used for all experiments prior to antibody incubation. Sections were incubated in 10  
448 mM sodium citrate (Alfa Aesar, A12274) at 80°C for 10 minutes then washed in PBS. Sections were  
449 incubated in 0.5% hydrogen peroxide (Sigma, H1009) in milliQ water for 15 minutes then washed in PBS.  
450 Sections were blocked with 5% donkey serum in 0.3% Tween20 (VWR, 437082Q) in PBS (PBST) for 1 hr at  
451 room temperature, then incubated with GFP antiserum (1:4000; ab5450, Abcam) in blocking solution  
452 overnight at 4°C. After washing in 0.1% PBST, sections were incubated with biotinylated anti-goat IgG  
453 (1:400; AP180B, Millipore) in 0.3% PBST for 1.5 hrs at room temperature, followed by a 1 hr incubation  
454 with streptavidin conjugated to horseradish peroxidase (Vectastain Elite ABC kit, Vector Laboratories, PK-  
455 6100) and developed by DAB substrate (Abcam, ab94665). Sections were washed in PBS, prior to  
456 dehydration in ethanol and xylene, then mounting/coverslipping with Pertex mounting medium (Pioneer  
457 Research Chemicals Ltd., PRC/R/750). For immunofluorescent staining, slices were washed in PBS, prior  
458 to blocking for 1 hr in 5% donkey serum then incubation with primary antisera (table 1) in blocking solution  
459 overnight at 4°C. Slices were washed in and incubated with the appropriate secondary antisera (Alexa  
460 Fluor® 488 or 555; Invitrogen) diluted 1:500 for 2 hrs at room temperature. Following washing, mounted  
461 sections were coverslipped on superfrost slides using Vectashield (Vector Laboratories, H-1400-10). Slides  
462 were imaged using an Axio Scan.Z1 slide scanner (Zeiss) and confocal microscope (Leica TCS SP8 X,  
463 Wetzlar, Germany) with a 20x or 40x objective as indicated. Images were analysed in Halo Image Analysis  
464 Software (Indica Labs) and ImageJ.

| Antigen | Raised In | Concentration | Source |
|---------|-----------|---------------|--------|
|---------|-----------|---------------|--------|

|                         |            |                           |                             |
|-------------------------|------------|---------------------------|-----------------------------|
| GFP                     | Goat       | 1:1000 (unless specified) | Abcam, 5450                 |
| DSRed (RFP and mCherry) | Rabbit     | 1:1000                    | Takara Bio Clontech, 632496 |
| Serotonin (5-HT)        | Rabbit     | 1:10,000                  | Immunostar, 20080           |
| Somatostatin            | Rabbit     | 1:1000                    | Dako, A0566                 |
| Insulin                 | Guinea pig | 1:100                     | Abcam, 7842                 |
| Glucagon                | Rabbit     | 1:200                     | Santa Cruz, sc-7782         |
| nNos                    | Goat       | 1:500                     | Abcam, 1376                 |
| Calretinin              | Goat       | 1:300                     | Swant, cg1                  |
| NeuN                    | Mouse      | 1:1000                    | Millipore, MAB377           |

465 Table 1. Primary antisera used for immunohistochemistry.

466

#### 467 **Tissue extraction and reverse transcription-quantitative polymerase chain reaction (RT-qPCR)**

468

469 Animals were culled by cervical dislocation. Brain and colon tissues were extracted and frozen  
470 immediately on dry ice. Nodose and dorsal root ganglia (colon innervating T11, T12, L1m L5, L6 and S1,  
471 located using the most caudal rib joint to the spine) were frozen on dry ice immediately after dissection  
472 and pooling in 2mL Eppendorf tubes. For pancreatic islet extraction, pancreases were injected with  
473 collagenase V (0.5 mg/ml) and digested at 37°C. Islets were hand-picked into HBSS containing 0.1% wt/vol.  
474 fatty acid-free BSA. Each pancreas yielded approximately 150–300 islets which were pooled.

475 RNA from whole tissue segments was extracted using TRI Reagent (Sigma, T9424) according to  
476 manufacturer's instructions. RT-qPCR was performed and analysed as described in <sup>64</sup> using probes *Rxfp4*:  
477 Mm00731536\_s1 and *β-actin*: Mm02619580\_g1 (Applied Biosystems). Mean, SEM and statistics were  
478 obtained for the  $\Delta$ CT data and converted to relative expression levels ( $2^{\Delta\text{CT}}$ ) for presentation only.

479

480

#### 481 **Dissociation, fluorescence-activated cell sorting (FACS) and single cell RNA sequencing**

482 For large intestine epithelial cell samples, single cell suspensions were prepared from four *Rxfp4*-Cre731  
483 x Rosa26-EYFP mice (biological replicates) as previously described with the outer muscle layer removed  
484 prior to processing<sup>64</sup>. Cells were separated by flow cytometry using a MoFlo Beckman Coulter Cytomation  
485 sorter (Coulter Corp., Hialeah, FL) at the Cambridge Institute for Medical Research (CIMR) Flow Cytometry  
486 Core Facility. Cell gating was set according to cell size (FSC), cell granularity (SSC), FSC pulse-width for  
487 singlets, fluorescence at 488 nm/532 nm for EYFP and 647/670 nm for nuclear stain with DraQ5 (Biostatus,  
488 Shephed, Leicester, UK) to exclude cellular debris, aggregates and dead cells. All yellow fluorescent  
489 protein (YFP)-positive cells, and 20,000 negative cells, were collected separately into aliquots of 500  $\mu$ L of  
490 buffer RLT+ (Qiagen), with 143 mmol/L  $\beta$ -mercaptoethanol. RNA was extracted using a RNeasy Micro plus  
491 kit (Qiagen) and quantified using an Agilent 2100 Bioanalyser. Sequencing and analysis were performed  
492 as previously described<sup>65</sup>.

493 For hypothalamic samples, single cell suspensions were prepared and pooled from twelve female *Rxfp4*-  
494 Cre x EYFP mice (biological replicates) as previously described<sup>63</sup>. Briefly, mice were sacrificed by cervical  
495 dislocation and the hypothalamus dissected into Hibernate-A medium (ThermoFisher, A1247501)  
496 supplemented with 0.25% GlutaMAX (ThermoFisher, 35050061) and 2% B27 (ThermoFisher, A1895601).  
497 Tissue digested in Hibernate-A medium without calcium (BrainBits) containing 20 U/mL Papain  
498 (Worthington) and 1% GlutaMAX for 30 min at 37°C under agitation (Thermomixer, 500 rpm). After  
499 digestion, tissue was triturated in Hibernate-A medium with 3.5 U/mL DNase I (Sigma, D4263). The  
500 trituration supernatant was loaded on top of a BSA gradient prepared in Hibernate-A medium, spun for 5  
501 min at 300 rcf, and the pellet was resuspended in Hibernate-A medium + 1% BSA. The cell suspension was  
502 filtered through a 70  $\mu$ m cell strainer into a fresh tube. Fluorescence-activated cell sorting was performed  
503 using an Influx Cell Sorter (BD Biosciences, San Jose, CA, USA). Cell gating was set as above. Cells were  
504 sorted directly into individual wells of 96-well plates containing lysis buffer. 384 YFP-positive cells were  
505 isolated and processed using a Smart-Seq2 protocol<sup>66</sup>. Libraries were prepared from  $\sim$ 150 pg of DNA

506 using the Nextera XT DNA preparation kit (Illumina, FC-131-1096) and Nextera XT 96-Index kit (Illumina,  
507 FC-131-1002). Pooled libraries were run on the Illumina HiSeq 4000 at the Cancer Research UK Cambridge  
508 Institute Genomics Core. Sequencing reads were trimmed of adapters, aligned to the *Mus musculus*  
509 genome (GRCm38, Ensembl annotation version 101) using STAR (v2.7.3a), and raw counts generated using  
510 FeatureCounts (Subread v2.0.0). Downstream analyses were performed using the Seurat R package  
511 (v4.0.1). Samples were included in the final analyses only if they met all of the following criteria: (a) unique  
512 reads > 50%, (b) reads assigned to exons > 20%; (c) number of genes with (FPKM>1) > 3000; (d) total  
513 number of unique genes > 200. Genes were included in the final analyses if they were detected in at least  
514 3 samples. Marker genes were identified for clusters using the FindAllMarkers function in the Seurat  
515 package; the top 20 gene markers were cross referenced against other bulk and single cell RNAseq  
516 databases to assign cell type. Neuronal clusters were identified in a similar fashion using appropriate  
517 marker genes.

518

### 519 **RNAscope**

520 Detection of Mouse *Rxfp4* was performed on fixed, frozen sections using Advanced Cell Diagnostics (ACD)  
521 RNAscope® 2.5 LS Reagent Kit-RED (Cat No. 322150), RNAscope® LS 2.5 Probe- Mm-Rxfp4 (Cat No.  
522 317588) (ACD, Hayward, CA, USA). To prepare the sections, animals were anaesthetized with sodium  
523 pentobarbital solution (50 mg/kg in saline) and transcardially perfused with PBS followed by 4% PFA in  
524 PBS. Brains were extracted and post-fixed in 4% PFA for 24 hrs before being transferred to 25% sucrose  
525 for 24 hrs at 4°C. Brains were embedded in OCT compound, frozen in a Novec 7000 (Sigma)/dry ice slurry  
526 and stored at -80 C. 16µm cryosections containing the hypothalamus were prepared on a Leica CM1950  
527 cryostat (Wetzlar, Germany) at -12°C and stored at -20°C until required.



528 Slides were thawed at room temperature for 10 min before baking at 60°C for 45 min. The sections were  
529 then post-fixed in pre-chilled 4% PFA for 15 min at 4°C, washed in 3 changes of PBS for 5 min each before  
530 dehydration through 50%, 70%, 100% and 100% ethanol for 5 min each. The slides were air-dried for 5  
531 min before loading onto a Bond Rx instrument (Leica Biosystems). Slides were prepared using the frozen  
532 slide delay prior to pre-treatments using Epitope Retrieval Solution 2 (Cat No. AR9640, Leica Biosystems)  
533 at 95°C for 5 min, and ACD Enzyme from the LS Reagent kit at 40°C for 10 minutes. Probe hybridisation  
534 and signal amplification were performed according to manufacturer's instructions, with the exception of  
535 increased Amp5 incubation time at 30 min. Fast red detection of mouse *Rxfp4* was performed on the Bond  
536 Rx using the Bond Polymer Refine Red Detection Kit (Leica Biosystems, Cat No. DS9390) with an incubation  
537 time of 20 min. Slides were then removed from the Bond Rx and were heated at 60°C for 1 hr, dipped in  
538 xylene and mounted using EcoMount Mounting Medium (Biocare Medical, CA, USA. Cat No. EM897L).  
539 Sections were imaged on a Slide Scanner Axio Scan.Z1 microscope (Zeiss) using a 40x air objective. Three  
540 z-stack slices spanning 1.5µM were combined into an extended depth of field image (ZEN 2.6, Zeiss). The  
541 CZI files were read into Halo Image Analysis Software (Indica Labs).

542

### 543 **Statistical analysis**

544 All data were plotted using GraphPad Prism 7/8/9 software (GraphPad Software, Inc). Statistical analysis  
545 was performed by paired Student's t-tests, one-way ANOVA with multiple comparisons or two-way  
546 ANOVA with multiple comparisons, as indicated. N represents biological replicates. Sample size was  
547 computed based on pilot data and previously published data. Data are presented as mean ± SEM and  
548 probabilities of  $p < 0.05$  were considered statistically significant in all tests.

549

550

### 551 **Acknowledgements**

552 Metabolic Research Laboratories support was provided by the following core facilities: Disease Model  
553 Core, Genomics and Transcriptomics Core, Histology Core, Imaging Core, and Core Biochemical Assay  
554 Laboratory (supported by the MRC [MRC\_MC\_UU\_12012/5] and Wellcome Trust [100574/Z/12/Z]). RNA-  
555 sequencing was undertaken at the CRUK Cambridge Institute Genomics Core. Cell sorting was performed  
556 at the NIHR Cambridge BRC Cell Phenotyping Hub. We thank the Histopathology/ISH Core Facility at  
557 Cancer Research UK- Cambridge Institute, for assistance with in situ hybridisation. We also would like to  
558 thank Chris Riches and Maša Josipović for initial help with metabolic and operant cages, Pierre Larraufie  
559 for help with the EC transcriptome analysis and Van Lu for the help in the collection of nodose and dorsal  
560 root ganglia. JAT is supported by a NIHR Clinical Lectureship (CL-2019-14-504). Research in the laboratory  
561 of F.M.G. and F.R. is supported by the MRC (MRC\_MC\_UU\_12012/3) and Wellcome Trust (106262/Z/14/Z  
562 and 106263/Z/ 14/Z). O.R.M.W. is supported by an iCASE PhD studentship with AZ. F.M.G. and F.R. act as  
563 guarantors for this manuscript.

564

565

566

#### 567 **Author contributions**

568 JEL, ORMW, FMG and FR designed the research studies. JEL, ORMW, CB, LB and AEA conducted  
569 experiments. SJK and BG conducted the SmartSeq2 protocol and library preparation for single-cell RNA-  
570 sequencing and CAS led the bioinformatic analysis. EC and MT provided the rabies and AAV-helper viruses  
571 for retrograde viral tracing. JAT prepared the tissues and gave guidance for RNAscope. DH and DB co-  
572 supervised ORMW and BVP helped with the initial behavioural cage experiments. FR developed the  
573 transgenic models. JEL, ORMW, FMG and FR wrote the manuscript. All authors revised the final draft.

574

#### 575 **Competing interests**

576 F.M.G. is a paid consultant for Kallyope, New York. The Gribble-Reimann lab currently hosts projects that  
577 receive funding from AstraZeneca (O.R.M.W., BBSRC-iCase), Eli Lilly & Company and LGC. DH and DB are  
578 AZ employees and CB and BUP have also joined AZ since contributing to this work.

579

## 580 References

- 581 1. Bathgate, R.A. *et al.* Relaxin family peptides and their receptors. *Physiol Rev* **93**, 405-480 (2013).
- 582 2. Ang, S.Y. *et al.* The actions of relaxin family peptides on signal transduction pathways activated by  
583 the relaxin family peptide receptor RXFP4. *Naunyn Schmiedebergs Arch Pharmacol* **390**, 105-111  
584 (2017).
- 585 3. Liu, C. & Lovenberg, T.W. Relaxin-3, INSL5, and their receptors. *Results Probl Cell Differ* **46**, 213-  
586 237 (2008).
- 587 4. Billing, L.J. *et al.* Co-storage and release of insulin-like peptide-5, glucagon-like peptide-1 and  
588 peptideYY from murine and human colonic enteroendocrine cells. *Mol Metab* (2018).
- 589 5. Grosse, J. *et al.* Insulin-like peptide 5 is an orexigenic gastrointestinal hormone. *Proceedings of the*  
590 *National Academy of Sciences of the United States of America* **111**, 11133-11138 (2014).
- 591 6. DeChristopher, B. *et al.* Discovery of a small molecule RXFP3/4 agonist that increases food intake  
592 in rats upon acute central administration. *Bioorganic & medicinal chemistry letters* **29**, 991-994  
593 (2019).
- 594 7. Burnicka-Turek, O. *et al.* INSL5-deficient mice display an alteration in glucose homeostasis and an  
595 impaired fertility. *Endocrinology* **153**, 4655-4665 (2012).
- 596 8. Liu, C. *et al.* Identification of relaxin-3/INSL7 as a ligand for GPCR142. *J Biol Chem* **278**, 50765-  
597 50770 (2003).
- 598 9. Boels, K. & Schaller, H.C. Identification and characterisation of GPR100 as a novel human G-  
599 protein-coupled bradykinin receptor. *Br J Pharmacol* **140**, 932-938 (2003).
- 600 10. Kay, R.G., Galvin, S., Larraufie, P., Reimann, F. & Gribble, F.M. Liquid chromatography/mass  
601 spectrometry based detection and semi-quantitative analysis of INSL5 in human and murine  
602 tissues. *Rapid Commun Mass Spectrom* **31**, 1963-1973 (2017).
- 603 11. Lee, Y.S. *et al.* Insulin-like peptide 5 is a microbially regulated peptide that promotes hepatic  
604 glucose production. *Mol Metab* **5**, 263-270 (2016).
- 605 12. Zaykov, A.N., Gelfanov, V.M., Perez-Tilve, D., Finan, B. & DiMarchi, R.D. Insulin-like peptide 5 fails  
606 to improve metabolism or body weight in obese mice. *Peptides* **120**, 170116 (2019).
- 607 13. Lewis, J.E. *et al.* Selective stimulation of colonic L cells improves metabolic outcomes in mice.  
608 *Diabetologia* **63**, 1396-1407 (2020).
- 609 14. Munro, J. *et al.* Relaxin polymorphisms associated with metabolic disturbance in patients treated  
610 with antipsychotics. *J Psychopharmacol* **26**, 374-379 (2012).
- 611 15. Jendryka, M. *et al.* Pharmacokinetic and pharmacodynamic actions of clozapine-N-oxide,  
612 clozapine, and compound 21 in DREADD-based chemogenetics in mice. *Sci Rep* **9**, 4522 (2019).
- 613 16. Musatov, S. *et al.* Silencing of estrogen receptor alpha in the ventromedial nucleus of  
614 hypothalamus leads to metabolic syndrome. *Proc Natl Acad Sci U S A* **104**, 2501-2506 (2007).
- 615 17. Luo, S.X. *et al.* Regulation of feeding by somatostatin neurons in the tuberal nucleus. *Science* **361**,  
616 76-81 (2018).

- 617 18. Kim, D.W. *et al.* Multimodal Analysis of Cell Types in a Hypothalamic Node Controlling Social  
618 Behavior. *Cell* **179**, 713-728.e717 (2019).
- 619 19. van Veen, J.E. *et al.* Hypothalamic estrogen receptor alpha establishes a sexually dimorphic  
620 regulatory node of energy expenditure. *Nat Metab* **2**, 351-363 (2020).
- 621 20. Li, M.M. *et al.* The Paraventricular Hypothalamus Regulates Satiety and Prevents Obesity via Two  
622 Genetically Distinct Circuits. *Neuron* **102**, 653-667.e656 (2019).
- 623 21. Wall, N.R., Wickersham, I.R., Cetin, A., De La Parra, M. & Callaway, E.M. Monosynaptic circuit  
624 tracing in vivo through Cre-dependent targeting and complementation of modified rabies virus.  
625 *Proc Natl Acad Sci U S A* **107**, 21848-21853 (2010).
- 626 22. Mashima, H., Ohno, H., Yamada, Y., Sakai, T. & Ohnishi, H. INSL5 may be a unique marker of  
627 colorectal endocrine cells and neuroendocrine tumors. *Biochem Biophys Res Commun* **432**, 586-  
628 592 (2013).
- 629 23. Thanasupawat, T. *et al.* INSL5 is a novel marker for human enteroendocrine cells of the large  
630 intestine and neuroendocrine tumours. *Oncol Rep* **29**, 149-154 (2013).
- 631 24. Luo, X. *et al.* The insulinotrophic effect of insulin-like peptide 5 in vitro and in vivo. *Biochem J* **466**,  
632 467-473 (2015).
- 633 25. Adriaenssens, A.E. *et al.* Transcriptomic profiling of pancreatic alpha, beta and delta cell  
634 populations identifies delta cells as a principal target for ghrelin in mouse islets. *Diabetologia* **59**,  
635 2156-2165 (2016).
- 636 26. Ewbank, S.N. *et al.* Chronic G. *Proc Natl Acad Sci U S A* **117**, 20874-20880 (2020).
- 637 27. King, B.M. The rise, fall, and resurrection of the ventromedial hypothalamus in the regulation of  
638 feeding behavior and body weight. *Physiol Behav* **87**, 221-244 (2006).
- 639 28. MILLER, N.E., BAILEY, C.J. & STEVENSON, J.A. Decreased "hunger" but increased food intake  
640 resulting from hypothalamic lesions. *Science* **112**, 256-259 (1950).
- 641 29. TEITELBAUM, P. Random and food-directed activity in hyperphagic and normal rats. *J Comp*  
642 *Physiol Psychol* **50**, 486-490 (1957).
- 643 30. Grossman, S.P. The  
644 VMH: a center for affective reactions, satiety, or both? . **1**, 1-10 (1966).
- 645 31. Lindberg, D., Chen, P. & Li, C. Conditional viral tracing reveals that steroidogenic factor 1-positive  
646 neurons of the dorsomedial subdivision of the ventromedial hypothalamus project to autonomic  
647 centers of the hypothalamus and hindbrain. *J Comp Neurol* **521**, 3167-3190 (2013).
- 648 32. Hashikawa, K. *et al.* *Esr1*. *Nat Neurosci* **20**, 1580-1590 (2017).
- 649 33. Coutinho, E.A. *et al.* Activation of SF1 Neurons in the Ventromedial Hypothalamus by DREADD  
650 Technology Increases Insulin Sensitivity in Peripheral Tissues. *Diabetes* **66**, 2372-2386 (2017).
- 651 34. Viskaitis, P. *et al.* Modulation of SF1 Neuron Activity Coordinately Regulates Both Feeding  
652 Behavior and Associated Emotional States. *Cell Rep* **21**, 3559-3572 (2017).
- 653 35. Yang, C.F. *et al.* Sexually dimorphic neurons in the ventromedial hypothalamus govern mating in  
654 both sexes and aggression in males. *Cell* **153**, 896-909 (2013).
- 655 36. Lee, H. *et al.* Scalable control of mounting and attack by *Esr1*+ neurons in the ventromedial  
656 hypothalamus. *Nature* **509**, 627-632 (2014).
- 657 37. Krause, W.C. & Ingraham, H.A. Origins and Functions of the Ventrolateral VMH: A Complex  
658 Neuronal Cluster Orchestrating Sex Differences in Metabolism and Behavior. *Adv Exp Med Biol*  
659 **1043**, 199-213 (2017).
- 660 38. Correa, S.M. *et al.* An estrogen-responsive module in the ventromedial hypothalamus selectively  
661 drives sex-specific activity in females. *Cell Rep* **10**, 62-74 (2015).
- 662 39. Ebling, F.J.P. & Lewis, J.E. Tanycytes and hypothalamic control of energy metabolism. *Glia* **66**,  
663 1176-1184 (2018).

- 664 40. Rogge, G., Jones, D., Hubert, G.W., Lin, Y. & Kuhar, M.J. CART peptides: regulators of body weight,  
665 reward and other functions. *Nat Rev Neurosci* **9**, 747-758 (2008).
- 666 41. Cavuoto, P. & Wittert, G.A. The role of the endocannabinoid system in the regulation of energy  
667 expenditure. *Best Pract Res Clin Endocrinol Metab* **23**, 79-86 (2009).
- 668 42. Xu, B. *et al.* Brain-derived neurotrophic factor regulates energy balance downstream of  
669 melanocortin-4 receptor. *Nat Neurosci* **6**, 736-742 (2003).
- 670 43. Sampson, C.M. *et al.* Small-Molecule Neuromedin U Receptor 2 Agonists Suppress Food Intake  
671 and Decrease Visceral Fat in Animal Models. *Pharmacol Res Perspect* **6**, e00425 (2018).
- 672 44. Moon, Y.S. *et al.* Mice lacking paternally expressed Pref-1/Dlk1 display growth retardation and  
673 accelerated adiposity. *Mol Cell Biol* **22**, 5585-5592 (2002).
- 674 45. Wermter, A.K. *et al.* Preferential reciprocal transfer of paternal/maternal DLK1 alleles to obese  
675 children: first evidence of polar overdominance in humans. *Eur J Hum Genet* **16**, 1126-1134  
676 (2008).
- 677 46. Wang, D. *et al.* Whole-brain mapping of the direct inputs and axonal projections of POMC and  
678 AgRP neurons. *Front Neuroanat* **9**, 40 (2015).
- 679 47. Williams, G. *et al.* The hypothalamus and the control of energy homeostasis: different circuits,  
680 different purposes. *Physiology & behavior* **74**, 683-701 (2001).
- 681 48. Kelley, A.E., Baldo, B.A., Pratt, W.E. & Will, M.J. Corticostriatal-hypothalamic circuitry and food  
682 motivation: integration of energy, action and reward. *Physiology & behavior* **86**, 773-795 (2005).
- 683 49. Kenny, P.J. Reward mechanisms in obesity: new insights and future directions. *Neuron* **69**, 664-  
684 679 (2011).
- 685 50. Tobiansky, D.J. *et al.* The medial preoptic area modulates cocaine-induced activity in female rats.  
686 *Behav Neurosci* **127**, 293-302 (2013).
- 687 51. Tryon, V.L. & Mizumori, S.J.Y. A Novel Role for the Periaqueductal Gray in Consummatory  
688 Behavior. *Front Behav Neurosci* **12**, 178 (2018).
- 689 52. Wu, Q., Boyle, M.P. & Palmiter, R.D. Loss of GABAergic signaling by AgRP neurons to the  
690 parabrachial nucleus leads to starvation. *Cell* **137**, 1225-1234 (2009).
- 691 53. Chiang, M.C. *et al.* Parabrachial Complex: A Hub for Pain and Aversion. *J Neurosci* **39**, 8225-8230  
692 (2019).
- 693 54. Lo, L. *et al.* Connectional architecture of a mouse hypothalamic circuit node controlling social  
694 behavior. *Proc Natl Acad Sci U S A* **116**, 7503-7512 (2019).
- 695 55. Ma, S., Smith, C.M., Blasiak, A. & Gundlach, A.L. Distribution, physiology and pharmacology of  
696 relaxin-3/RXFP3 systems in brain. *Br J Pharmacol* **174**, 1034-1048 (2017).
- 697 56. Atasoy, D., Aponte, Y., Su, H.H. & Sternson, S.M. A FLEX switch targets Channelrhodopsin-2 to  
698 multiple cell types for imaging and long-range circuit mapping. *J Neurosci* **28**, 7025-7030 (2008).
- 699 57. Shimshek, D.R. *et al.* Codon-improved Cre recombinase (iCre) expression in the mouse. *Genesis*  
700 **32**, 19-26 (2002).
- 701 58. Srinivas, S. *et al.* Cre reporter strains produced by targeted insertion of EYFP and ECFP into the  
702 ROSA26 locus. *BMC Dev Biol* **1**, 4 (2001).
- 703 59. Zhu, H. *et al.* Cre-dependent DREADD (Designer Receptors Exclusively Activated by Designer  
704 Drugs) mice. *Genesis* **54**, 439-446 (2016).
- 705 60. Zariwala, H.A. *et al.* A Cre-dependent GCaMP3 reporter mouse for neuronal imaging in vivo. *J*  
706 *Neurosci* **32**, 3131-3141 (2012).
- 707 61. Luche, H., Weber, O., Nageswara Rao, T., Blum, C. & Fehling, H.J. Faithful activation of an extra-  
708 bright red fluorescent protein in "knock-in" Cre-reporter mice ideally suited for lineage tracing  
709 studies. *Eur J Immunol* **37**, 43-53 (2007).

- 710 62. Heath, C.J., Phillips, B.U., Bussey, T.J. & Saksida, L.M. Measuring Motivation and Reward-Related  
711 Decision Making in the Rodent Operant Touchscreen System. *Current protocols in neuroscience*  
712 **74**, 8.34.31-38.34.20 (2016).
- 713 63. Adriaenssens, A.E. *et al.* Glucose-Dependent Insulinotropic Polypeptide Receptor-Expressing Cells  
714 in the Hypothalamus Regulate Food Intake. *Cell metabolism* **30**, 987-996.e986 (2019).
- 715 64. Billing, L.J. *et al.* Single cell transcriptomic profiling of large intestinal enteroendocrine cells in mice  
716 - Identification of selective stimuli for insulin-like peptide-5 and glucagon-like peptide-1 co-  
717 expressing cells. *Molecular metabolism* **29**, 158-169 (2019).
- 718 65. Roberts, G.P. *et al.* Comparison of Human and Murine Enteroendocrine Cells by Transcriptomic  
719 and Peptidomic Profiling. *Diabetes* **68**, 1062-1072 (2019).
- 720 66. Picelli, S. *et al.* Smart-seq2 for sensitive full-length transcriptome profiling in single cells. *Nat*  
721 *Methods* **10**, 1096-1098 (2013).

722

723

724 **Figure Legends**

725 **Figure 1: RXFP4 is expressed in the central nervous system.**

726 a) Scaled schematic of the bacterial artificial chromosome used to make *Rxfp4*-Cre mice. b) Crossing of  
727 *Rxfp4*-Cre mice with GFP-based reporter mice (EYFP or GCaMP3) used to detect *Rxfp4* expression in Fig 1  
728 through GFP immunohistochemistry. c) Representative section from the colon of RXFP4<sup>EYFP</sup> mice  
729 demonstrating *Rxfp4* expression in epithelial cells. Scale bar = 100  $\mu$ m. d,e) Coronal section of RXFP4<sup>GCaMP3</sup>  
730 mice show distinct *Rxfp4*-expressing cell clusters in the ventrolateral part of the ventromedial  
731 hypothalamus (VMHvl) and adjacent tuberal nucleus. Scale bars = 500  $\mu$ m. f) Co-staining for DAPI (blue),  
732 GFP (green) and NeuN (red) in the VMHvl of RXFP4<sup>GCaMP3</sup> mice. Scale bar = 100  $\mu$ m. g,h) Coronal sections  
733 of C57Bl6 mice labelled for *Rxfp4* mRNA in the VMHvl using RNAscope. Scale bar = 1 mm and 50  $\mu$ m in the  
734 enlarged image (h).

735

736 **Suppl Fig1: *Rxfp4* expression in peripheral tissues of interest**

737 a) Co-localisation of GFP (green) and serotonin (red) in colonic epithelial cells from RXFP4<sup>EYFP</sup> mice, with  
738 nuclei stained blue (Hoechst). Scale bar = 20  $\mu$ m. a(i) Percentage of singly GFP and GFP/5-HT double  
739 positive cells in n=3 mice, with 6-8 images taken at x20 magnification per mouse. b) Heatmap showing the  
740 top 20 most differentially expressed genes found during RNA-sequencing of FACS-isolated cell populations  
741 from four RXFP4<sup>EYFP</sup> mice large intestines (non-coding and mitochondrial genes were excluded). Values  
742 are log<sub>10</sub>(FPKM+1). Genes and samples are grouped via hierarchical clustering based on Euclidean  
743 distance and complete linkage. c) EYFP positive (+) and control (-) cell populations were generated by FACS  
744 from RXFP4<sup>EYFP</sup> mouse large intestinal tissue (n=3). mRNA was extracted and expression of tryptophan  
745 hydroxylase 1 (*Tph1*), peptide YY (*Pyy*), proglucagon (*Gcg*), insulin-like peptide 5 (*InsI5*), vesicular  
746 monoamine transporter 1 (*VMAT1*, *Slc18a1*), glucagon-like peptide 1 receptor (*Glp1r*) and *Rxfp4*  
747 determined relative to  $\beta$ -actin. mRNA undetected (UD). Mean  $\Delta$ CT and upper SEM were calculated and

748 data presented as  $2^{\Delta\Delta CT}$ . Statistically significant differences as indicated were assessed on the non-  
749 transformed data using a two-way ANOVA and post hoc Bonferroni (effect of genotype [F(1,2)=101.8, p =  
750 0.0097, *Tph1* p = <0.0001, *Pyy* <0.0001, *Gcg* 0.0001, *InsI5* 0.0002, *Sc18a1* < 0.0001, *Glp1r* < 0.0001 and  
751 *Rxfp4* < 0.0001 respectively). d) Representative images from cultured colonic enteric ganglia from  
752 RXFP4<sup>tdRFP</sup> mice immunostained for (left) red fluorescent protein (RFP, green) and neuronal nitric oxide  
753 synthase (nNOS, red), and (right) Calretinin (green) and RFP (red). No RFP presence was observed. Nuclei  
754 stained with Hoechst (blue); Scale bar = 50  $\mu$ m. e) Representative dorsal root and e) nodose ganglion from  
755 RXFP4<sup>EYFP</sup> mice stained with GFP (green) and Hoechst (blue) Scale bars = 200  $\mu$ m. g,h) Representative  
756 pancreatic islets sections from RXFP4<sup>EYFP</sup> mice stained for GFP (green), insulin (Ins, white) and either  
757 glucagon (*Gcg*, red (f) or somatostatin (*Sst*, red (g)); Nuclei stained by Hoechst (blue); No GFP-staining was  
758 observed; scale bars = 20  $\mu$ m. i) *Rxfp4* mRNA detected in different tissues by RT-qPCR (n=3 mice). Bars  
759 represent mean  $2^{\Delta CT} \pm$  SEM compared to  $\beta$ -actin. NG = nodose ganglion, DRG (ci) = colon innervating dorsal  
760 root ganglia, DRG = other dorsal root ganglia.

## 761 **Suppl. Fig 2: *Rxfp4* expression in the central nervous system**

762 Coronal sections from RXFP4<sup>GCaMP3</sup> mice stained for GFP immunoreactivity reveal *Rxfp4* expression in  
763 various central nuclei. Red circles represent the presence of immunoreactive cells. Reference images  
764 based on the Paxinos Mouse Brain Atlas with the A/P coordinates from bregma indicated in the top left  
765 corner. AOB: Accessory olfactory bulb; GrO: Granular cell layer of the olfactory; vn: vomeronasal nerve;  
766 ACC: anterior cingulate cortex; SSC: somatosensory cortex; GI: granular insular cortex; SFi: septofimbrial  
767 nucleus; TS: triangular septal nucleus; SFO: subfornical organ; NBD: nucleus of the diagonal band; AV:  
768 anteroventral thalamic nucleus; AHA: anterior hypothalamic area; PLH: peduncular lateral hypothalamus;  
769 PVH: paraventricular hypothalamus; MCPO: magnocellular preoptic nucleus; AA: anterior amygdaloid  
770 area; SI: substantia innominata; GP: globus pallidus; RSC: retrosplenial cortex; MHb: medial habenular  
771 nucleus; CeA: central amygdala; CoA: cortical amygdala; DEn: dorsal endopiriform nucleus; DMH:



772 dorsomedial hypothalamus; VMHvl: ventromedial hypothalamus ventrolateral part; ARC: arcuate nucleus;  
773 ZI: zona incerta; BLA: basolateral amygdala; DS: dorsal subiculum; SC: superior colliculus; PAG:  
774 periaqueductal grey (D: dorsal, L: lateral, VL: ventrolateral); scp: superior cerebellar peduncle; SuM:  
775 supramammillary nucleus; MM: medial mammillary nucleus; MnM: medial mammillary nucleus median  
776 part; LM: lateral mammillary nucleus; PMCoA: posteromedial cortical amygdala; PnO: pontine reticular  
777 nucleus oral part; ml: medial lemniscus; lfp: longitudinal fasciculus of the pons; Cu: cuneate nucleus; Sp5:  
778 spinal trigeminal tract (C: caudal part, I: interpolar part).

779 **Figure 2: CNO alters feeding and food preference in RXFP4<sup>wb-Di</sup> mice.**

780 a) Schematic of RXFP4<sup>wb-Di</sup> mouse model. b-d) Food intake in RXFP4<sup>wb-Di</sup> mice of standard chow (t=0.5536,  
781 p = 0.5875) (b) or HFD (45%) (t=2.612, p = 0.0189) (c) or liquid Ensure (HPM) (t=2.648, p = 0.0175) (d) 1  
782 hour post CNO/vehicle treatment at 11:00 (n = 17, paired two-tailed t test, animals adapted to the  
783 appearance of test meal over the course of two weeks). (e) 1<sup>st</sup> hr (effect of treatment [F(1,36)=14.86, p =  
784 0.0005], std chow p = 0.7604, HFD p = 0.03, kcal p = 0.0121) and (f) 2<sup>nd</sup> hr food (effect of treatment  
785 [F(1,36)=2.219, p = 0.1450], std chow p = 0.9918, HFD p = 0.6691, kcal p = 0.4979) consumption after CNO  
786 (orange) or saline (black) injection at 11:00 (n = 7, two-way ANOVA with Sidak's multiple-comparison test)  
787 when mice had a choice between chow or HFD.

788 **Suppl. Fig 3: Calorimetric data from Rxfp4 Di and Dq mice**

789 Ambulatory activity (a,c,e) and energy expenditure (b,d,f) of RXFP4<sup>wb-Di</sup> (a,b, effect of time [F(8.262, 115.7)  
790 = 2.092, p = 0.0402] and effect of time [F(11.52, 161.3) = 8.018, p < 0.0001] respectively), RXFP4<sup>wb-Dq</sup> (c,d,  
791 effect of time [F(3.934,55.08) = 1.610, p = 0.0137 and effect of treatment [F(1, 13) = 5.860, p = 0.0309)  
792 and RXFP4<sup>VMHDq</sup> (e,f, effect of time [F(6.859, 82.31) = 4.411, p = 0.0004] and effect of time [F(4.170, 50.05)  
793 = 4.180, p = 0.0048] mice housed in metabolic cages in response to CNO (orange) or saline (black).  
794 Conditions and stats as in Fig2 (Di), Fig3 (Dq) and Fig5 (VMH-Dq), respectively.

795 **Figure 3: CNO alters feeding and food preference in RFXFP4<sup>wb-Dq</sup> mice**

796 a) Schematic of RFXFP4<sup>wb-Dq</sup> mouse model. b-d) Food intake of (b) standard chow ( $t=0.1.235$ ,  $p = 0.2628$ ) (c)  
797 HFD (45%) ( $t=5.136$ ,  $p = 0.0021$ ) and (d) liquid Ensure (HPM) ( $t=7.725$ ,  $p = 0.0002$ ) 1 hour post CNO/saline  
798 treatment at 19:00 ( $n = 7$ , paired two-tailed t test, animals adapted to the appearance of test meal over  
799 the course of two weeks). e) 1<sup>st</sup> hr (effect of treatment [ $F(1,42) = 13.17$ ,  $p = 0.0008$ , std chow  $p = 0.9321$ ,  
800 HFD  $p = 0.0377$ , kcal  $p = 0.0092$ ) and f) 2<sup>nd</sup> hr (effect of treatment [ $F(1,36)=0.1177$ ,  $p = 0.7335$ ], std chow  
801  $p = 0.9475$ , HFD  $p = 0.8197$ , kcal  $p = 0.9875$ ) food consumption after CNO (orange) or saline (black)  
802 injection at 19:00 in mice housed in metabolic chambers ( $n = 7$ , two-way ANOVA with Sidak's multiple-  
803 comparison test). g-i) Performance parameters in mice trained in operant chambers when treated with  
804 CNO (orange) or vehicle (black): g) Number of rewards earned in FR5 ( $n = 12$ ,  $t=6.874$ ,  $p < 0.001$ , paired  
805 two-tailed t test). h) Breakpoint in PR4 (number of target responses emitted by an animal in the last  
806 successfully completed trial, before session termination or 60 min time-out) ( $n = 12$ ,  $t=9.357$ , \*\*\*  $p <$   
807  $0.001$ , paired two tailed t test). i) ERC performance post vehicle (black) or CNO (orange) treatment  
808 between 11-13:00 ( $n = 12$ , effect of treatment [ $F(1,44)=41.38$ ,  $p < 0.0001$ , std chow  $p = 0.7212$ , HPM  $p <$   
809  $0.0001$ , two-way ANOVA with Sidak's multiple-comparison test, animals calorically restricted to 95% BW).

810 **Figure 4: Ventromedial hypothalamic *Rxfp4*-expressing neurons regulate food preference.**

811 a) AAV-hM3Dq-mCherry was bilaterally injected into the ventromedial hypothalamus of *Rxfp4*-Cre mice.  
812 b) Targeting efficiency was confirmed post perfusion fixation. Representative image showing ARC, VMH  
813 and DMH, with only VMH demonstrating AAV-hMEDq-mCherry expression. c-e) Food intake of (c)  
814 standard chow ( $t=0.08018$ ,  $p = 0.9387$ ) (d) HFD (45%) ( $t=4.299$ ,  $p = 0.0051$ ) and (e) liquid Ensure (HPM)  
815 ( $t=5.140$ ,  $0.0021$ ) 1 hour post CNO (orange) or vehicle (black) treatment at 19:00 ( $n = 7$ , paired two-tailed  
816 t test, animals adapted to the appearance of test meal over the course of two weeks. (f) 1<sup>st</sup> hr (effect of  
817 treatment [ $F(1,36)=13.86$ ,  $p = 0.0007$ , std chow  $p = 0.8049$ , HFD  $p = 0.0008$ , kcal  $p = 0.008$ ) and (g) 2<sup>nd</sup> hr  
818 (effect of treatment [ $F(1,36)=0.2153$ ,  $p = 0.6454$ , std chow  $p = 0.9165$ , HFD  $p = 0.9971$ , kcal  $p = 0.9703$ )

819 food consumption of RXFP4<sup>VMHDq</sup> mice post CNO (orange) or vehicle (black) treatment (n = 7 per group,  
820 mean ± SEM). Scale bar = 50µm.

821 **Suppl. Fig 4: CNO does not alter sucrose preference in RXFP4<sup>VMHDq</sup> mice.**

822 a) Water and sucrose (2%) intake of mice housed in metabolic cages in response to CNO (orange) or saline  
823 (black) treatment (n = 7 per group, two-way ANOVA, effect of treatment [F(1,24)=0.09980, p = 0.7548]  
824 with Sidak's multiple-comparison test, water p = 0.7582, 2% sucrose p = 0.9799).

825 **Figure 5: Transcriptomic profiling of hypothalamic *Rxfp4*-expressing cells by scRNAseq**

826 a,b) tSNE visualisation of 350 hypothalamic *Rxfp4*-expressing cells indicates five clusters (a). Cell types  
827 were assigned according to the expression of a combination of canonical cell-type markers genes (b). The  
828 red circle indicates the neuronal cluster used in further analysis. c) tSNE visualisation of the 95 neuronal  
829 cells revealed seven sub-clusters. d) Violin plots showing expression of marker genes associated with  
830 multiple neuronal cell types. All gene expression counts are log-normalised with scale-factor = 10<sup>4</sup>.

831 **Suppl. Fig 5: Transcriptomic profiling of the neuronal cluster from scRNAseq of hypothalamic *Rxfp4*-  
832 expressing cells**

833 Violin plots showing expression of multiple genes in the hypothalamic *Rxfp4*-expressing neuronal sub-  
834 clusters. All gene expression counts are log-normalised with scale-factor = 10<sup>4</sup>.

835 **Figure 6: Circuit mapping of hypothalamic *Rxfp4*-expressing cells**

836 a) Schematic illustrating unilateral microinjection of AAV8-DIO-hChr2(H134R)-mCherry into the VMHvl of  
837 RXFP4<sup>GCaMP3</sup> mice. b) Immunofluorescence images demonstrating co-localisation of GFP (green) and Chr2-  
838 mCherry (red) starter cells in the target region at A/P -1.7mm from bregma. c) Representative images  
839 showing Chr2-mCherry-immunoreactive axon terminals in various brain regions (n=3). For each image,  
840 distance from bregma (in mm) is indicated at the bottom right. Scale bars = 100 µm. 40x magnification. d)  
841 Schematic illustrating unilateral microinjection of AVV2-TVAeGFP-oG into the VMHvl of *Rxfp4*-Cre mice

842 followed by a unilateral microinjection of Rab-ΔG-EnvA-mCherry 21 days later. e) Immunofluorescence  
843 images demonstrating the colocalisation of GFP (green) and Rab-mCherry (red) starter cells in the target  
844 region A/P -1.7mm from bregma. f) Representative immunofluorescence images showing Rab-mCherry-  
845 immunoreactive cell bodies in various brain regions (n=3). For each image distance from bregma (in mm)  
846 is indicated at the bottom right. 20x magnification. g) Schematic illustrating the regions positive for  
847 anterograde projections (red arrows), retrograde projections (blue arrows) or bilateral projections (black  
848 arrows) from RXFP4<sup>VMH</sup> cells. Abbreviations: ARC: arcuate nucleus; BNST: bed nucleus of the stria  
849 terminalis; POA: Preoptic area; CeA: central amygdala; LHA: lateral hypothalamic area; PVH:  
850 paraventricular hypothalamus; VMHvl: ventromedial hypothalamus, ventrolateral part; PAG:  
851 periaqueductal grey; PVT: paraventricular thalamic nucleus; PMN: premammillary nucleus.

852 **Suppl. Fig 6: Anterograde projection regions from RXFP4<sup>VMH</sup> cells**

853 Representative images showing ChR2-mCherry-immunoreactive axon terminals in other brain regions,  
854 further to those already indicated in Fig6 (n=3). For each image, distance from bregma (in mm) is indicated  
855 at the bottom right. Scale bars = 100 um. 40x magnification. Abbreviations: AHA: anterior hypothalamic  
856 area; EAC: extended amygdala central part; SI: substantia innominata; LHA: lateral hypothalamic area;  
857 DMH: dorsomedial hypothalamus; VMHvl: ventromedial hypothalamus ventrolateral part; SuM:  
858 supramammillary nucleus; LC: locus coeruleus; PMNd: premammillary nucleus dorsal part.

859 **Suppl. Fig 7: Chemogenetic manipulation of Rxfp4 expressing cells does not alter glucose tolerance**

860 IPGTT (2g/kg BW following 16hr fast) in a) RXFP4<sup>wb-Di</sup> (one-way ANOVA F = 14.03, p = 0.0001 with Tukey  
861 multiple comparison lean – VEH vs lean – CNO p = 0.9801, DIO – VEH vs DIO – CNO p = 0.9877, lean VEH  
862 vs DIO – VEH p = 0.0021 and lean – CNO vs DIO – CNO p = 0.0018) b) RXFP4<sup>wb-Dq</sup> (one-way ANOVA F =  
863 16.57, p < 0.0001 with Tukey multiple comparison lean – VEH vs lean – CNO p = 0.9779, DIO – VEH vs DIO  
864 – CNO p = 0.9663, lean VEH vs DIO – VEH p = 0.0006 and lean – CNO vs DIO – CNO p = 0.0032) mice kept

865 on a chow diet (lean) or after induction of diet induced obesity (DIO) after 16 weeks feeding of a 45% HFD.

866 (n = 3-7 per group).

867

868

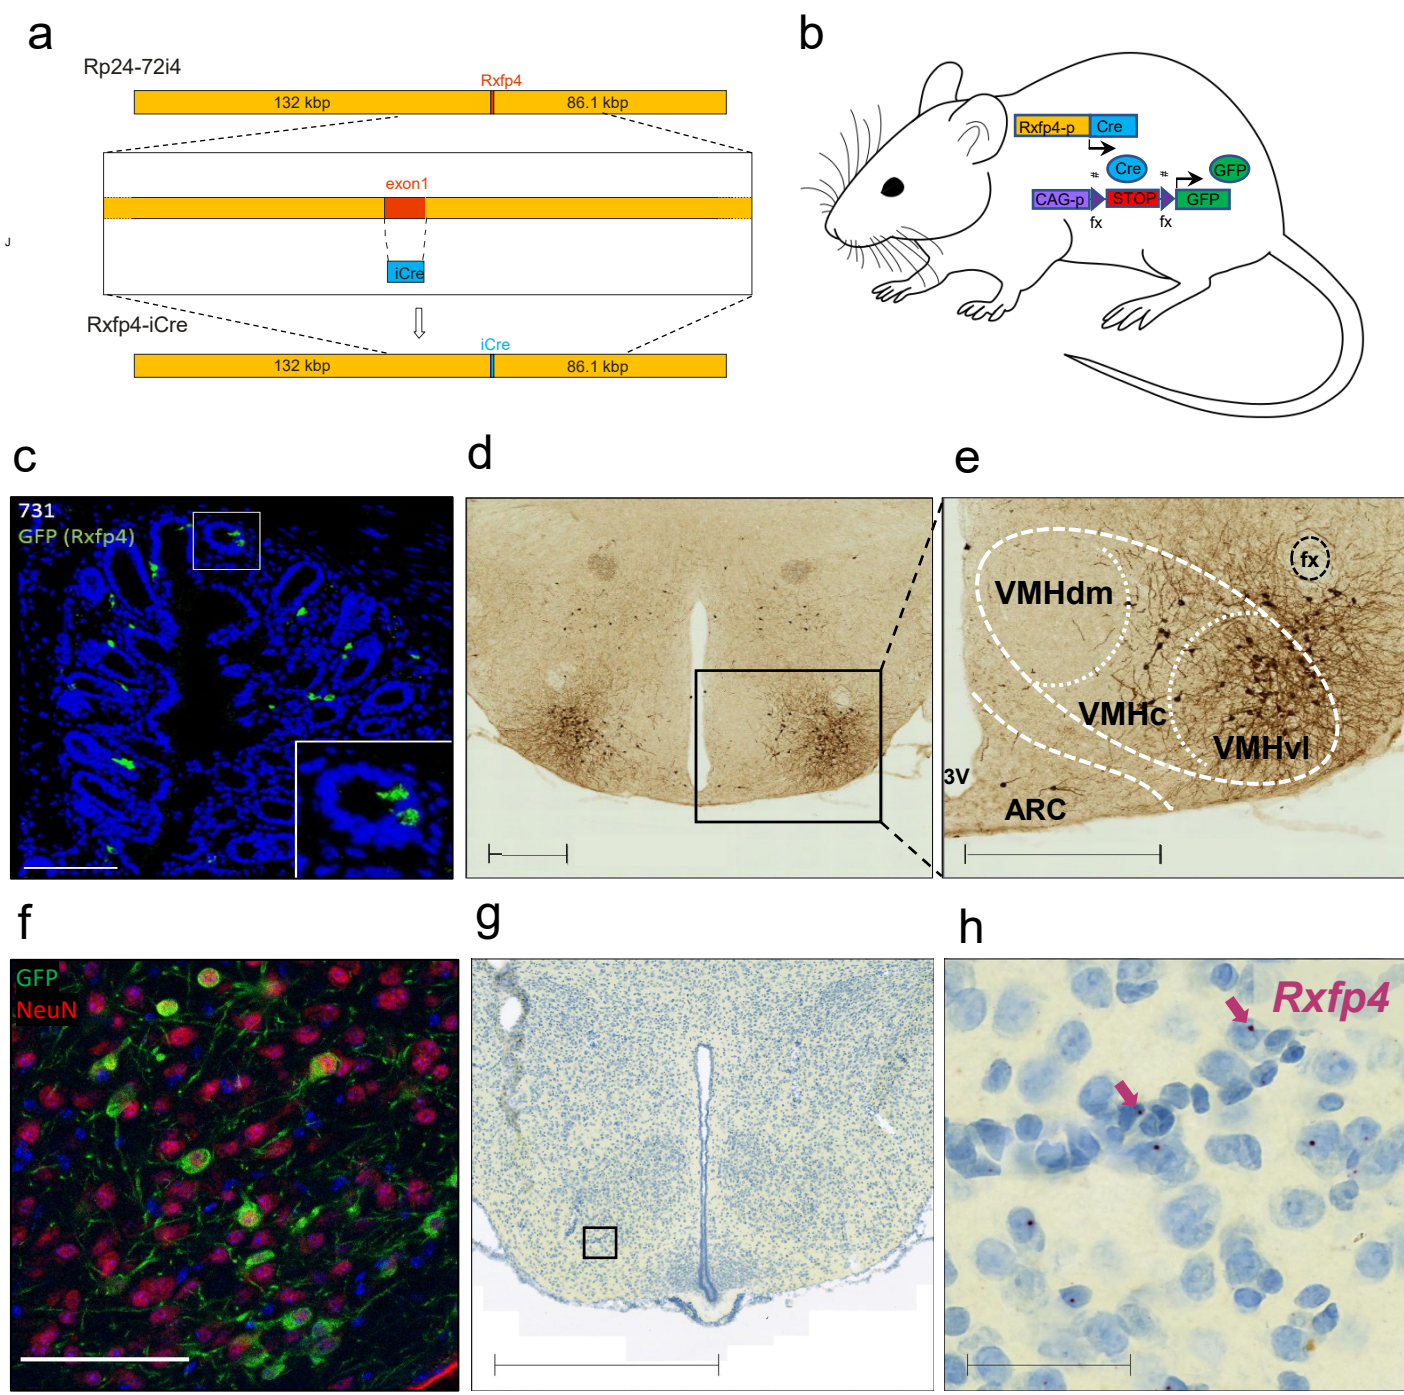

Figure 1



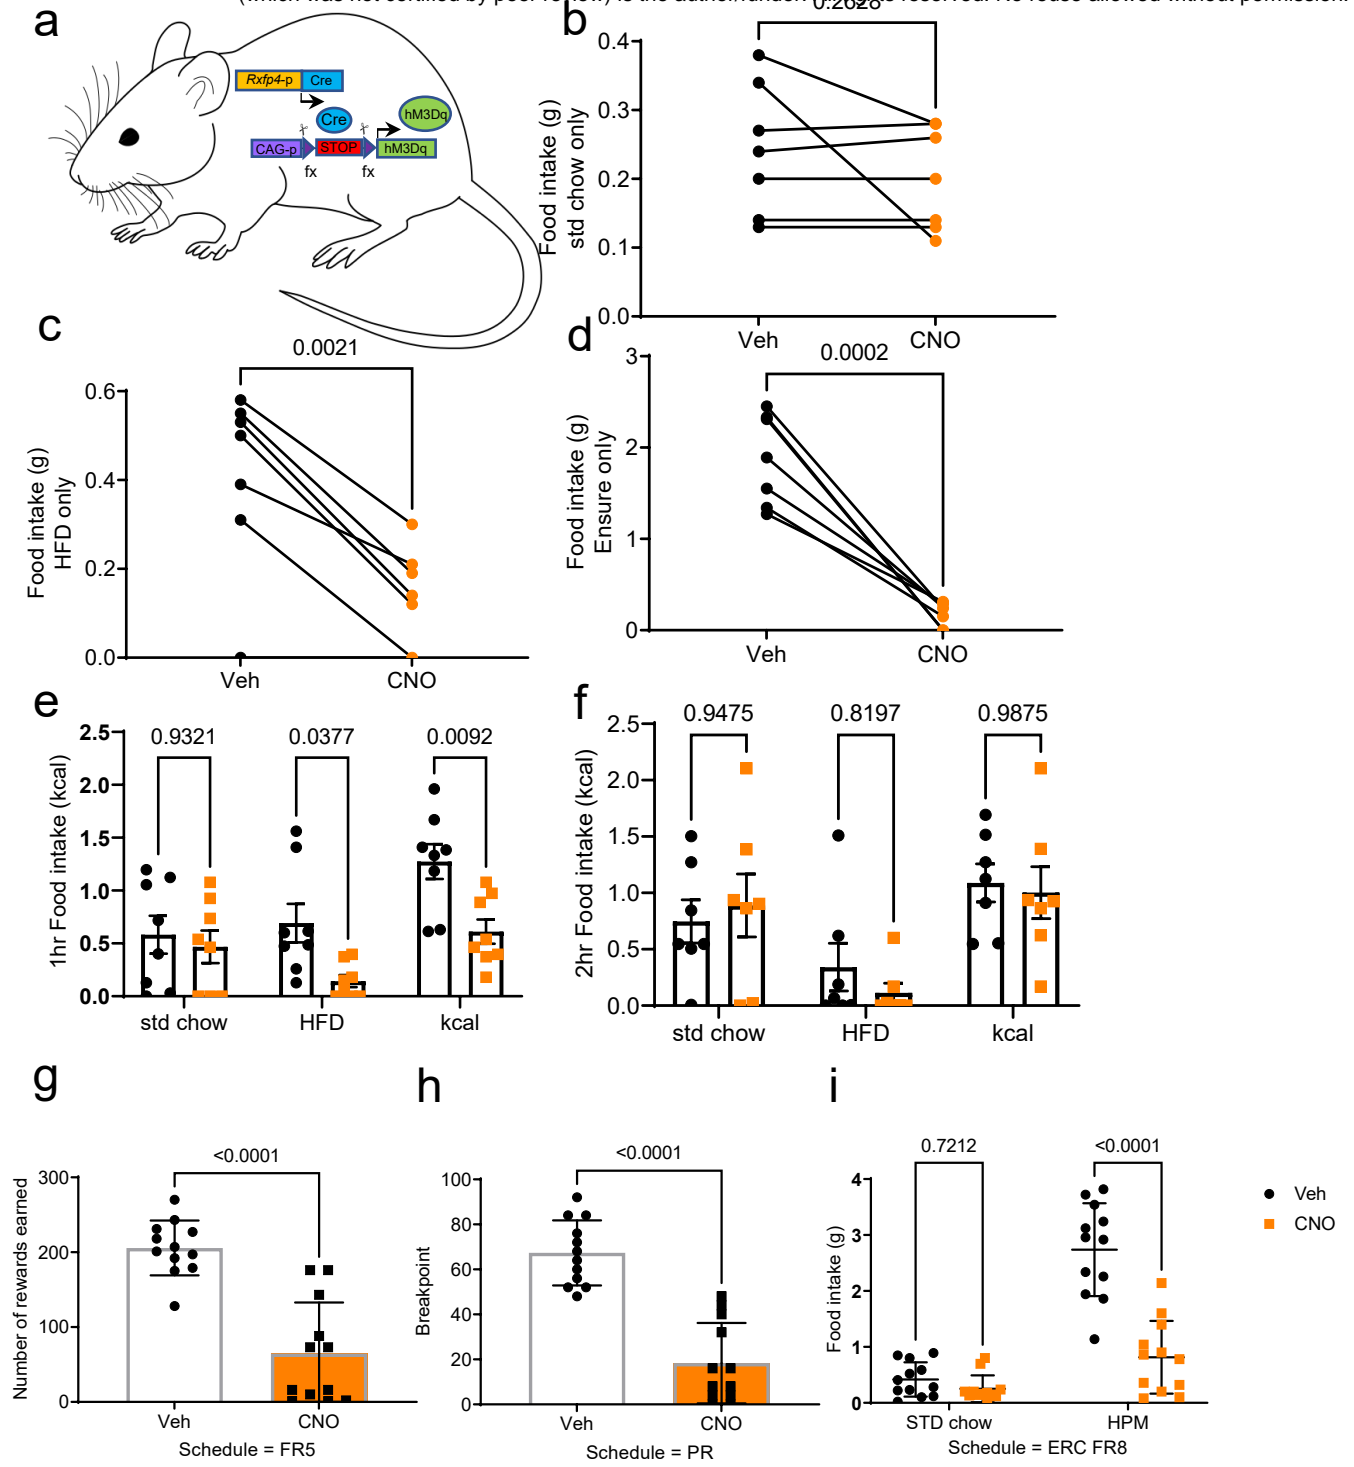

Figure 3



rAAV8-hM3Dq-mCherry (bilateral)

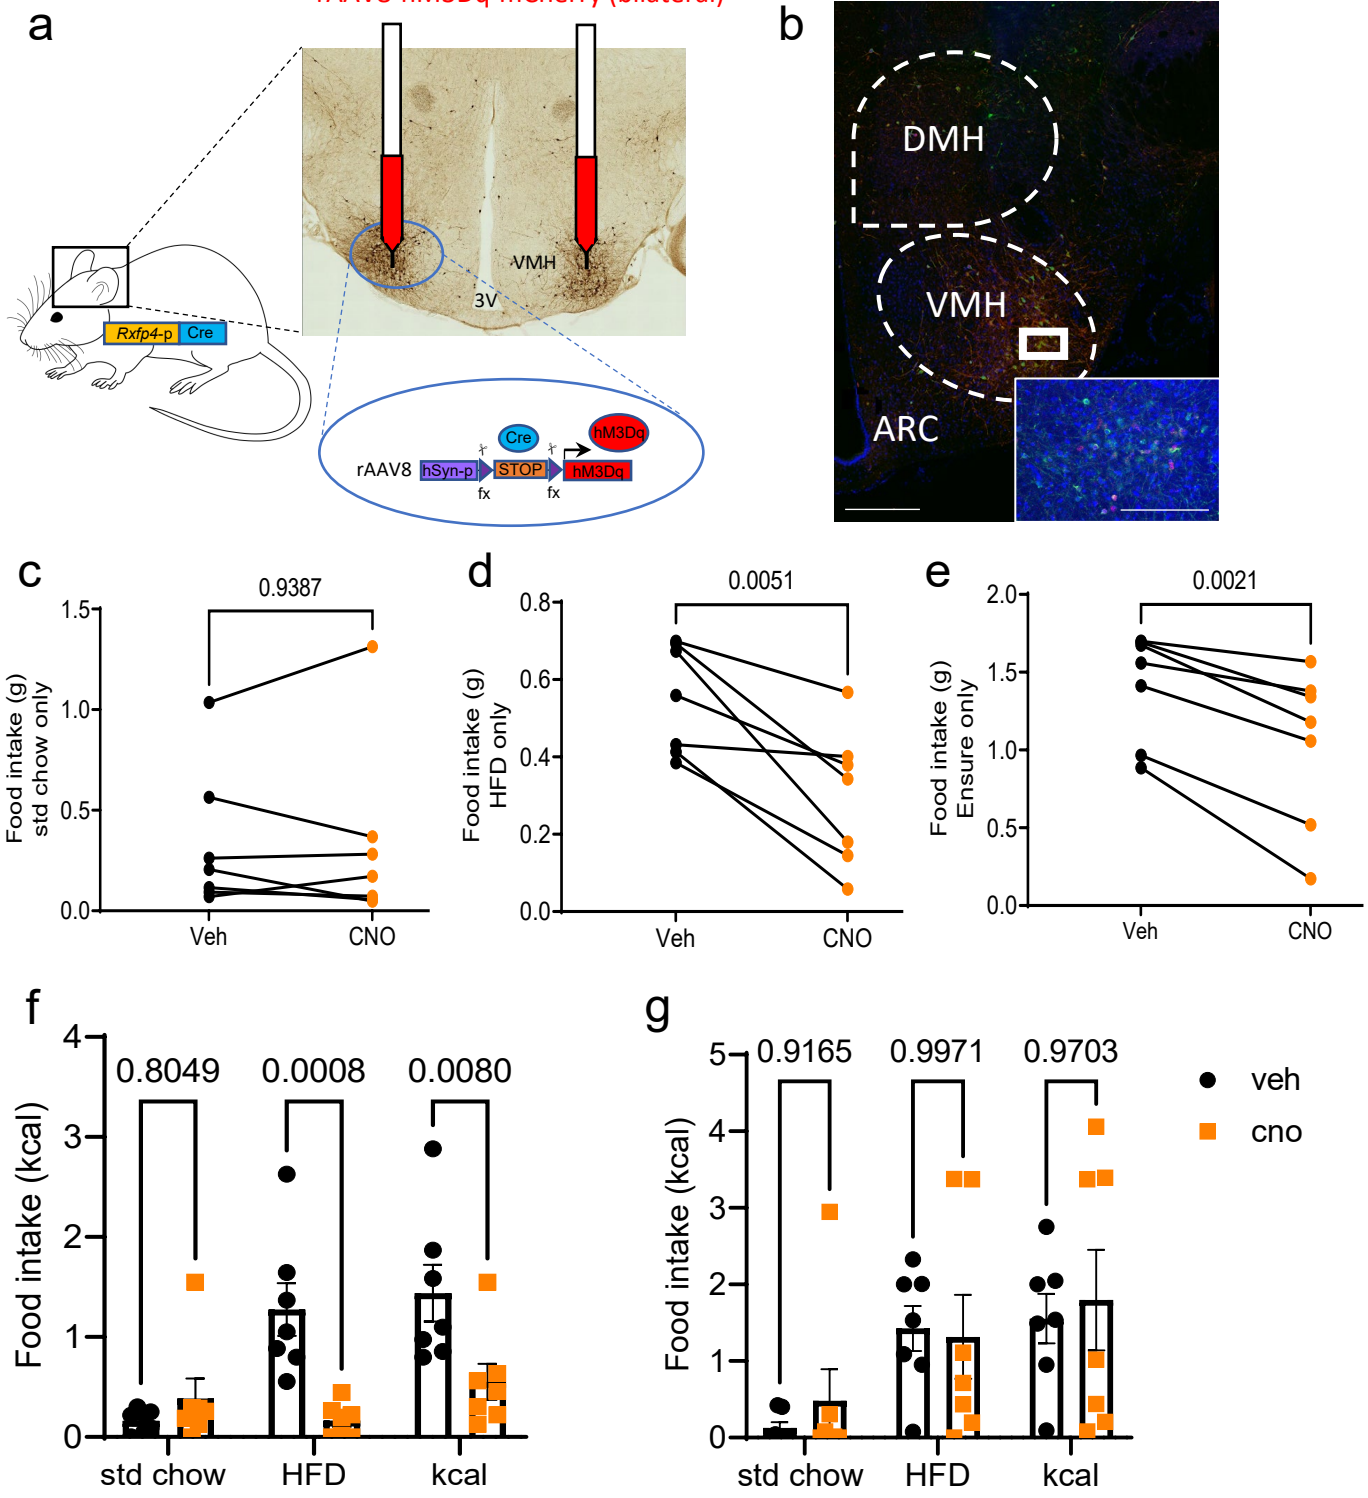

Figure 4

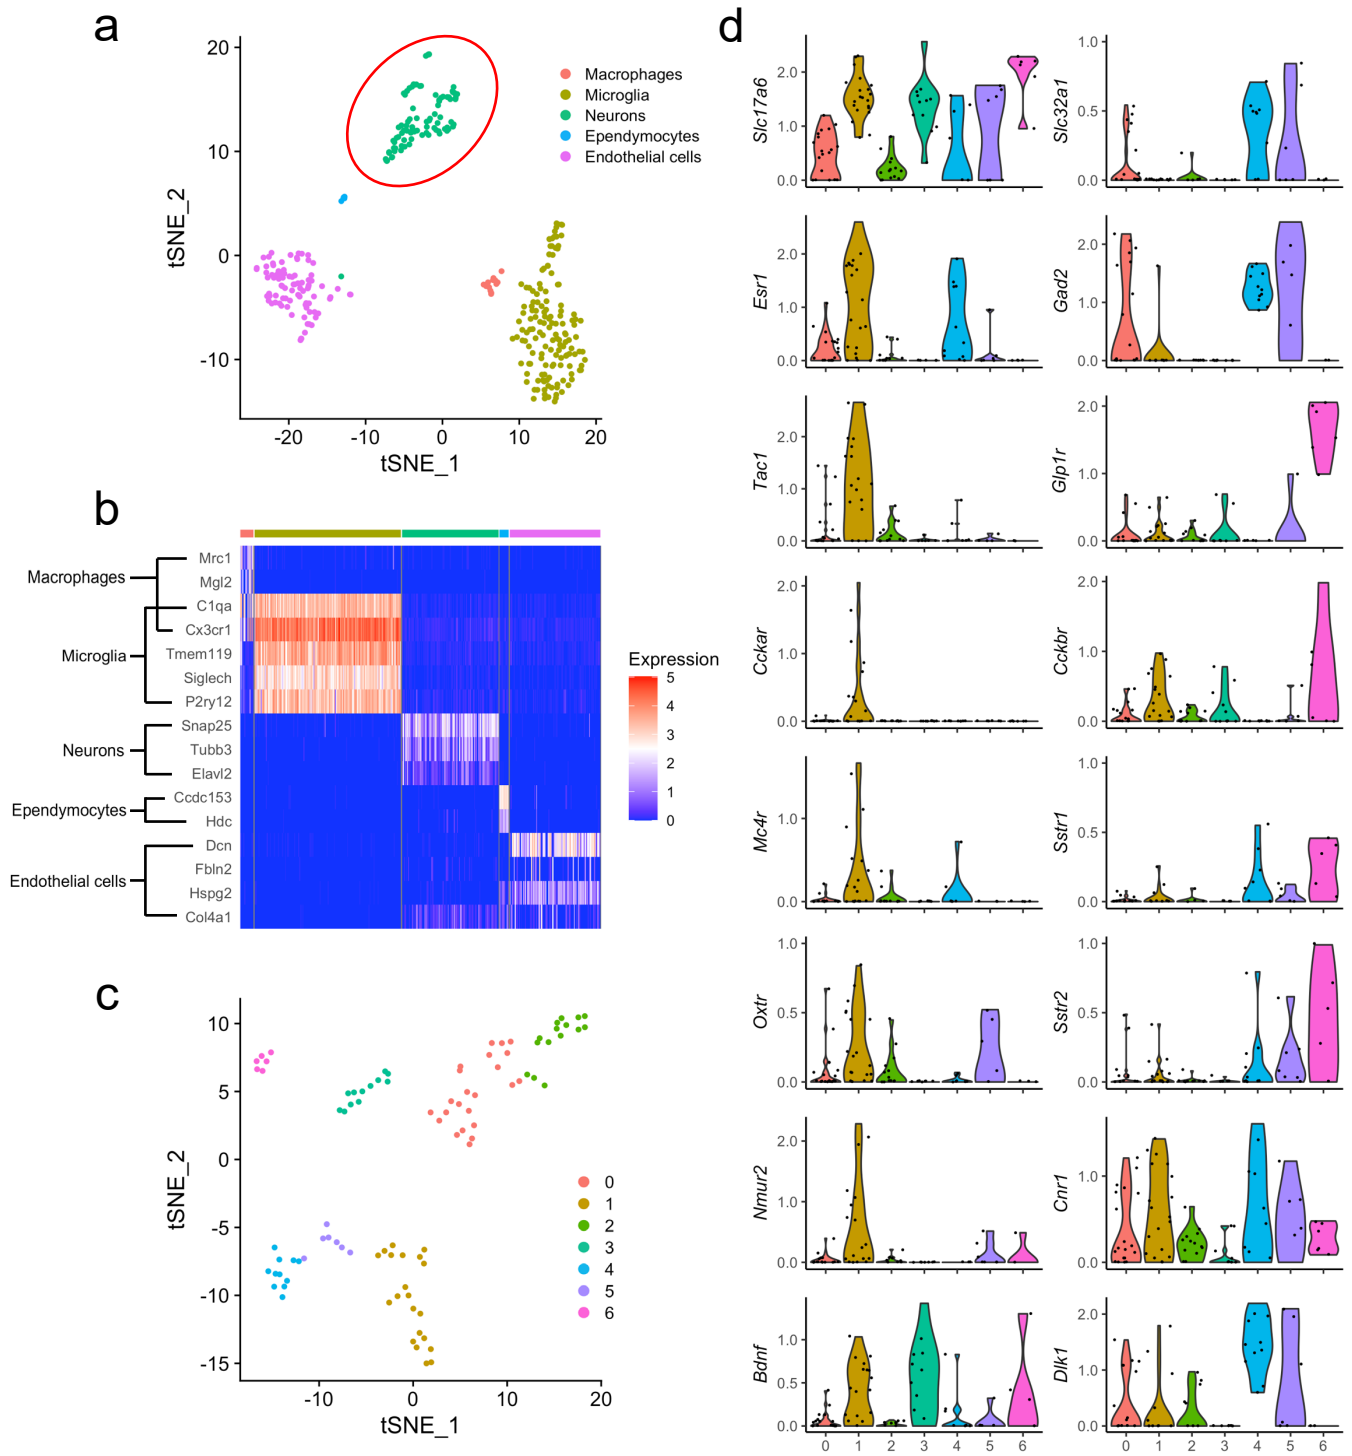

Figure 5

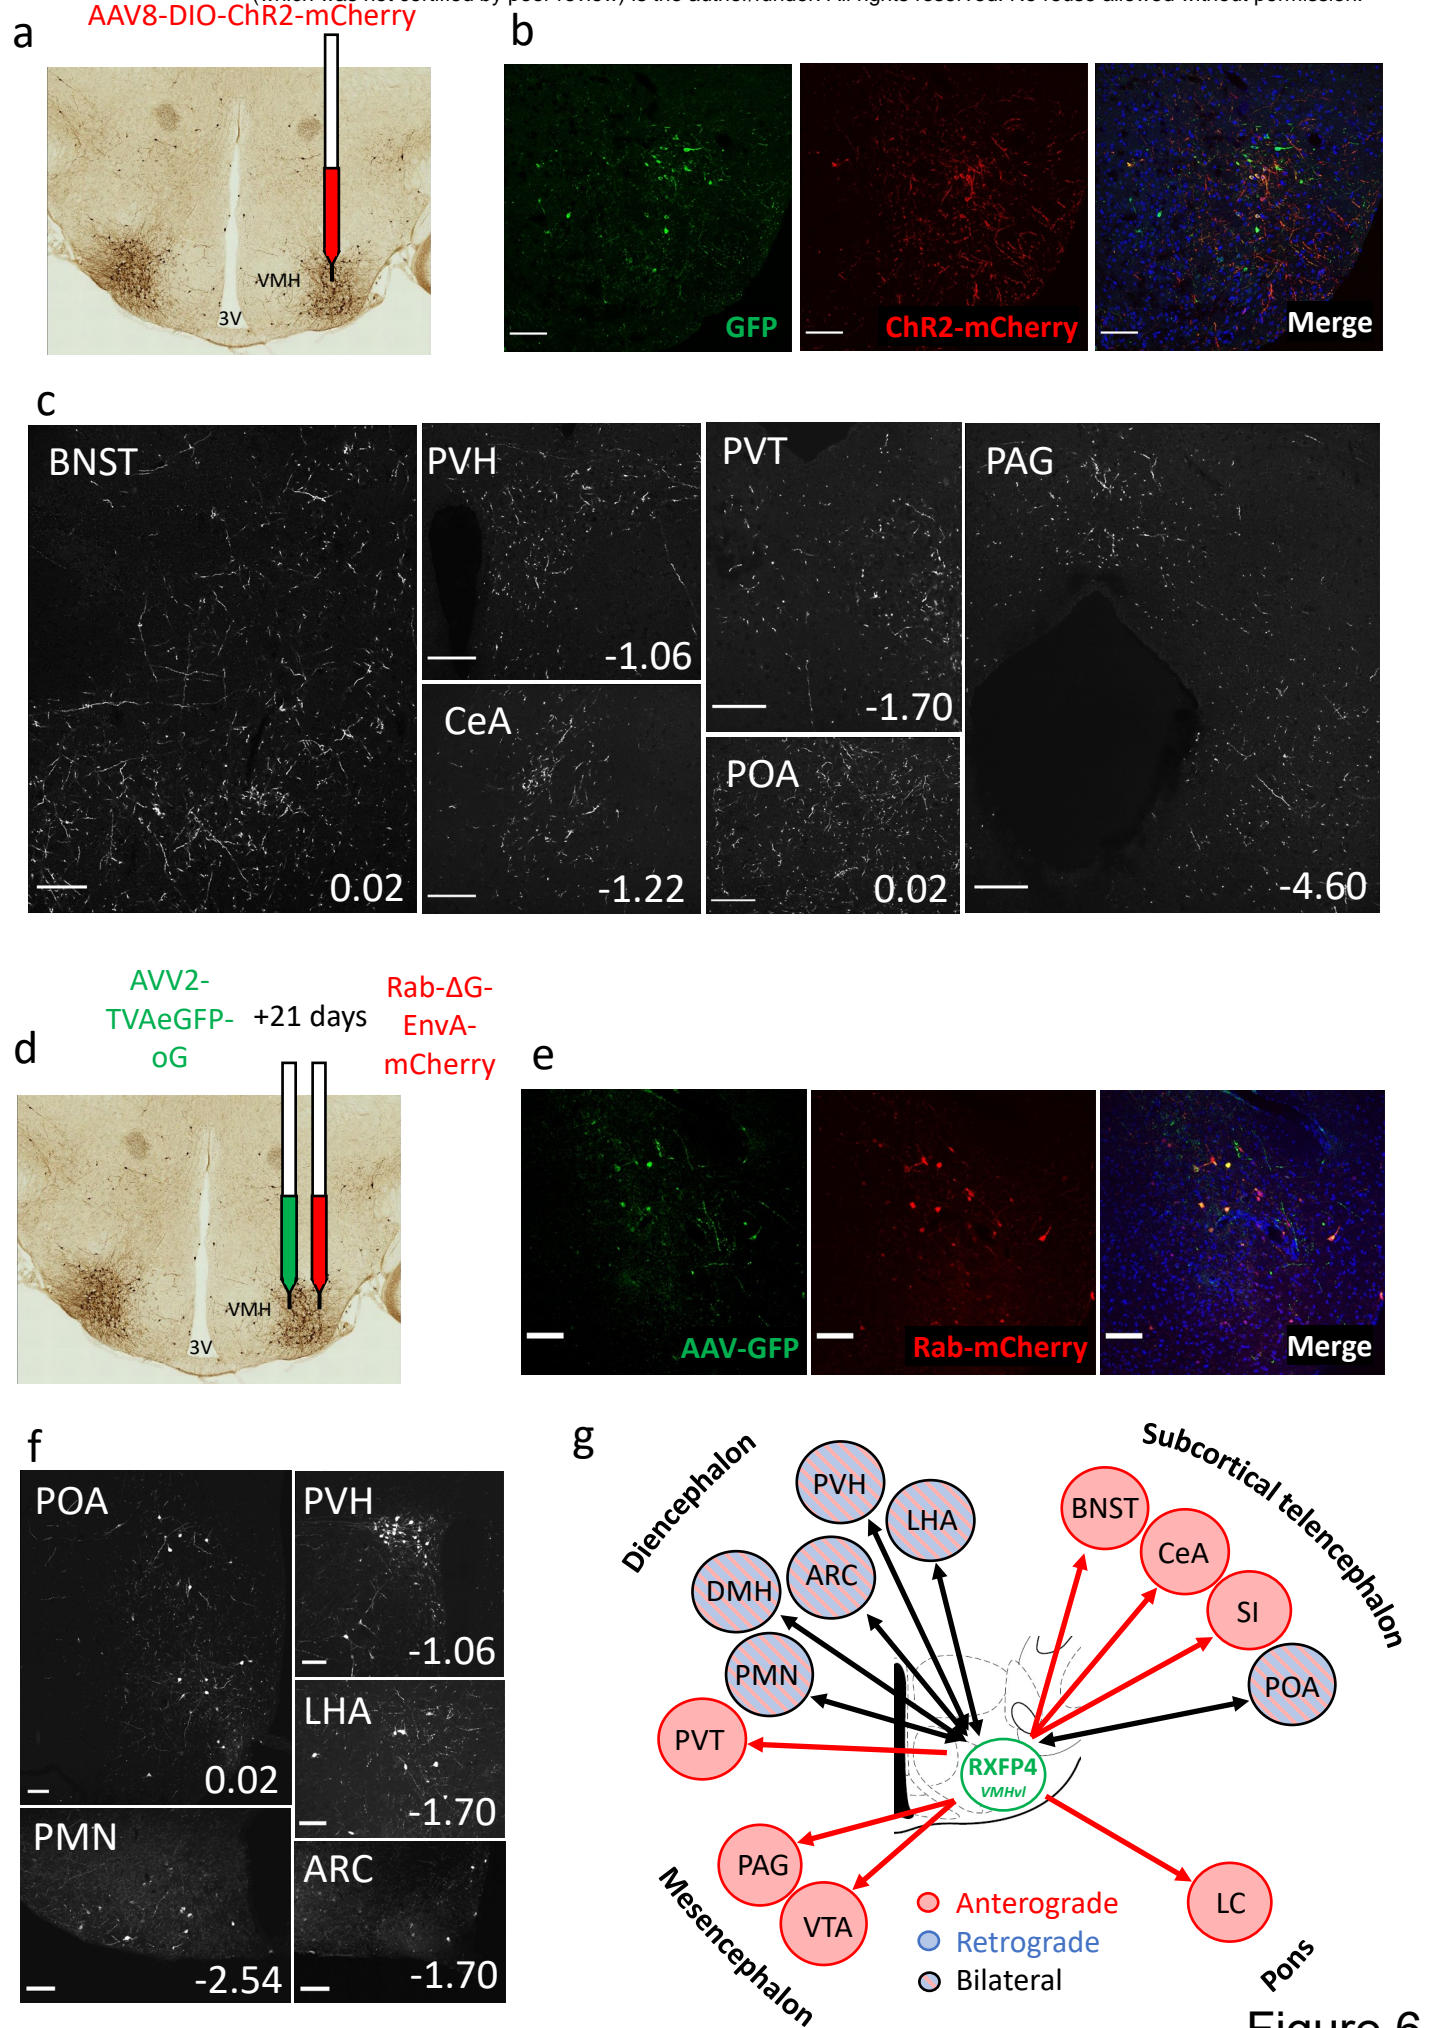

Figure 6
