# Supplementary material for: Relaxin/insulin-like family peptide receptor 4 (Rxfp4) expressing hypothalamic neurons modulate food intake and preference in mice
Source: bioRxiv or medRxiv preprint supplement (doi:10.1101/2021.06.26.450020), 2022-04-27

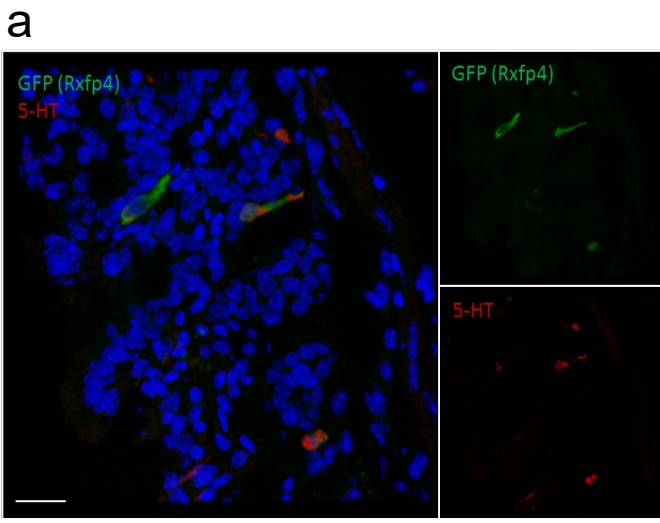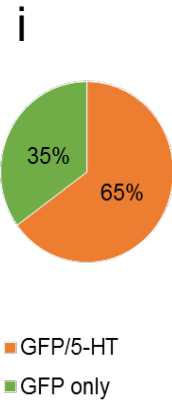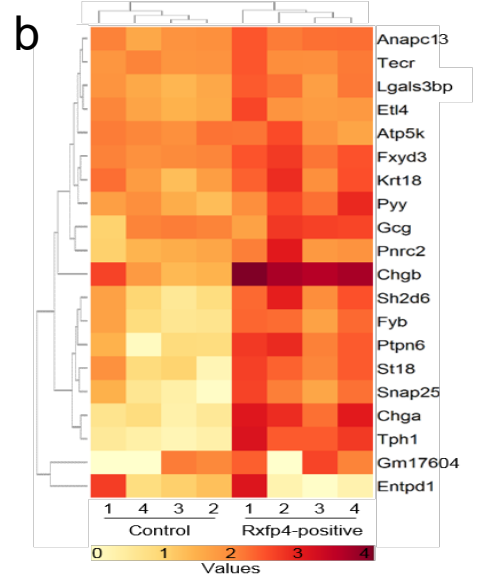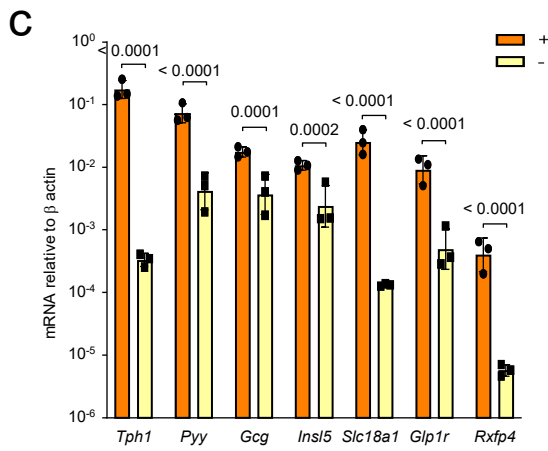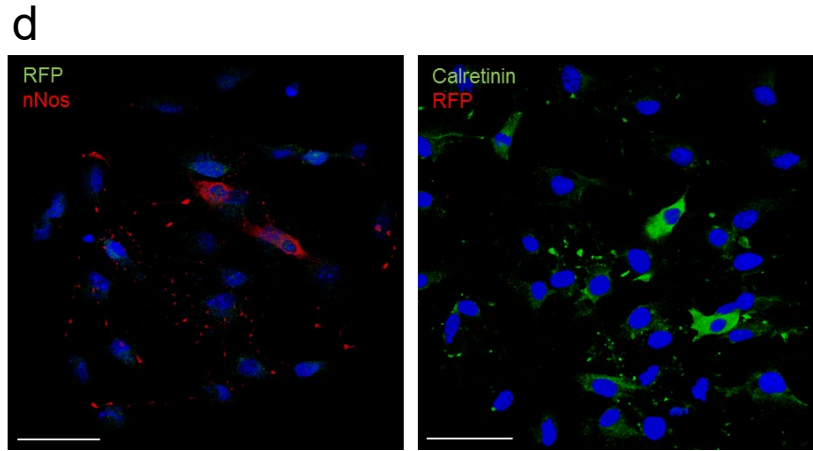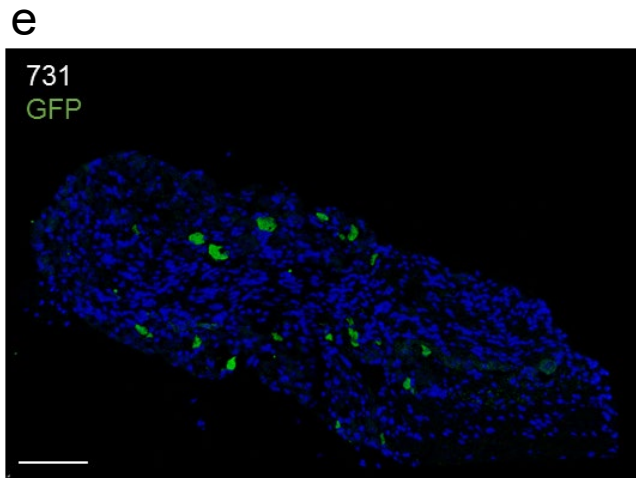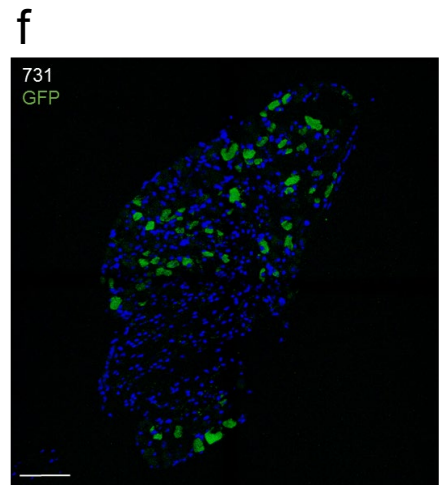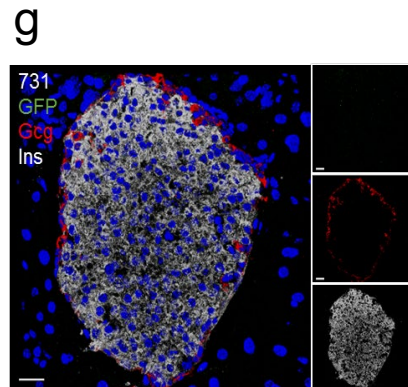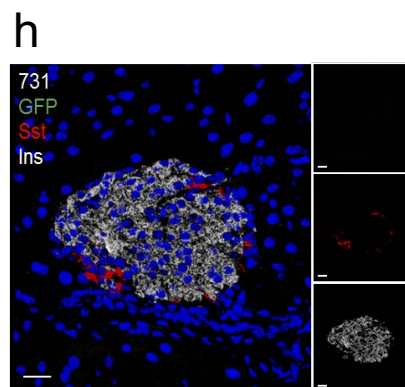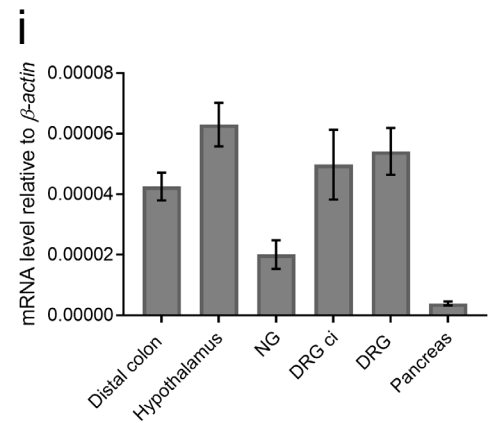

Supplementary Figure 1

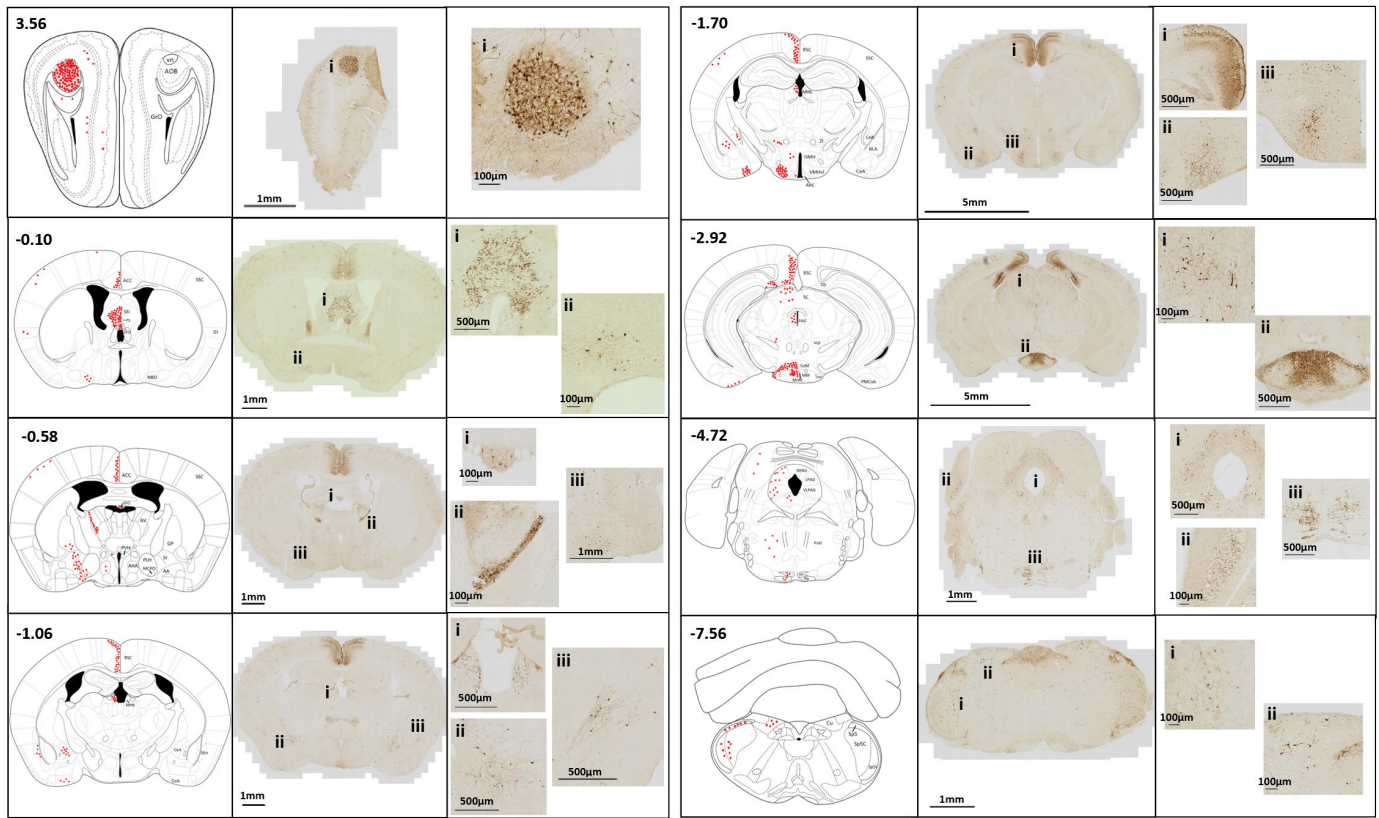

# RXFP4<sup>wb\_Di</sup>

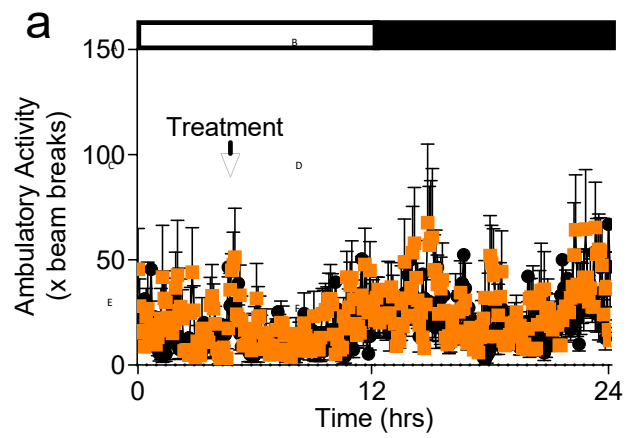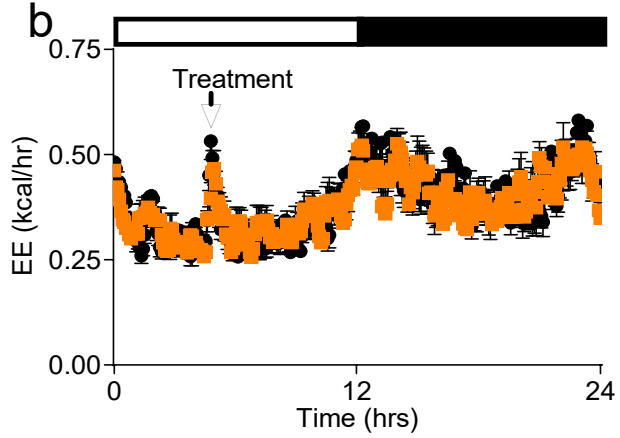

# RXFP4<sup>wb\_Dq</sup>

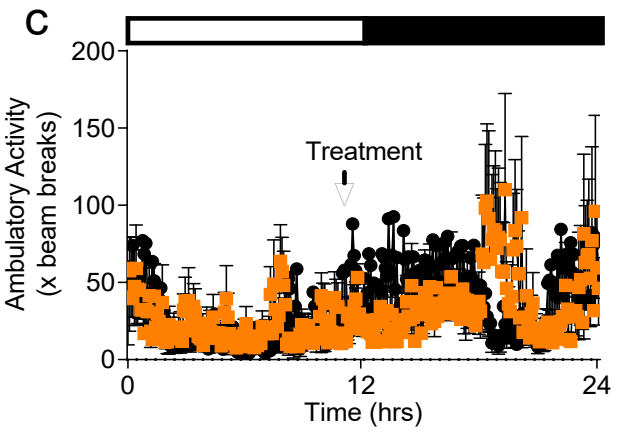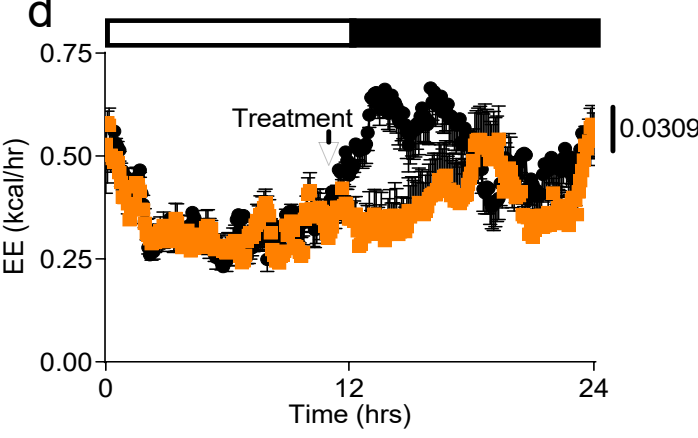

# RXFP4<sup>VMHDq</sup>

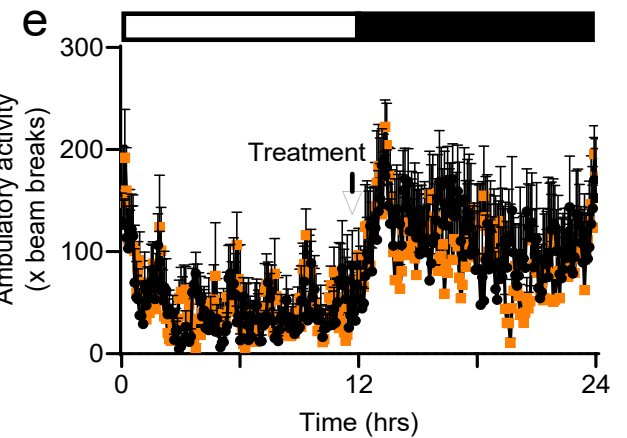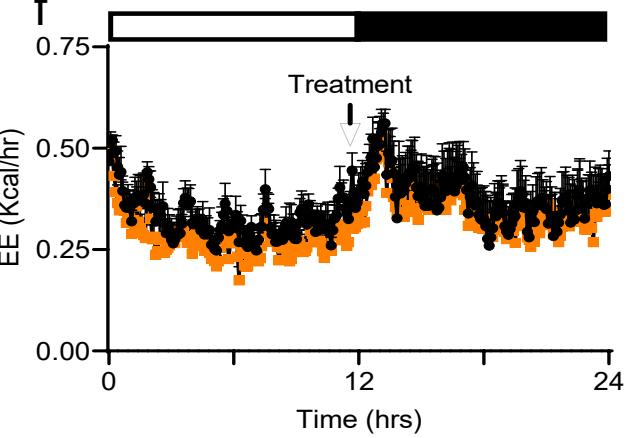

**a**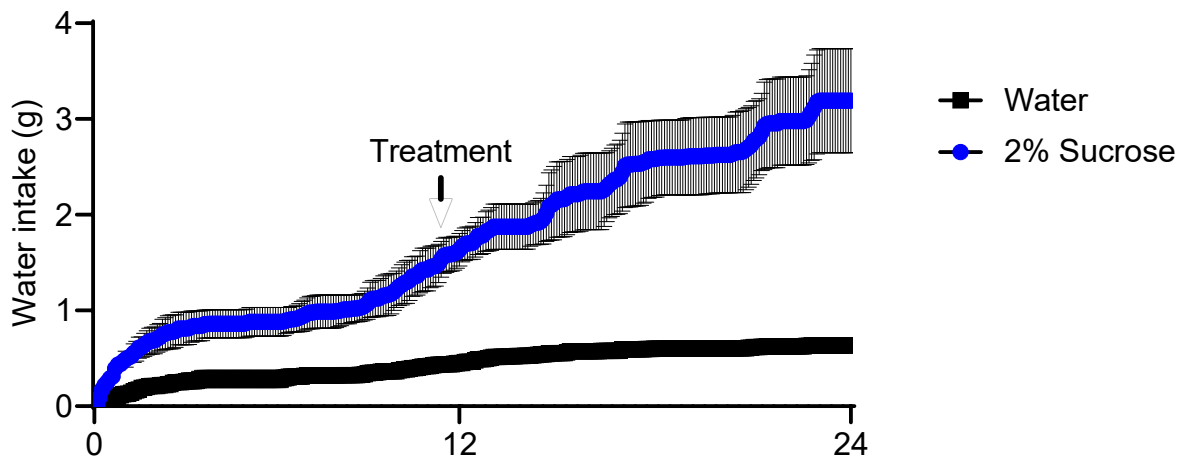**b**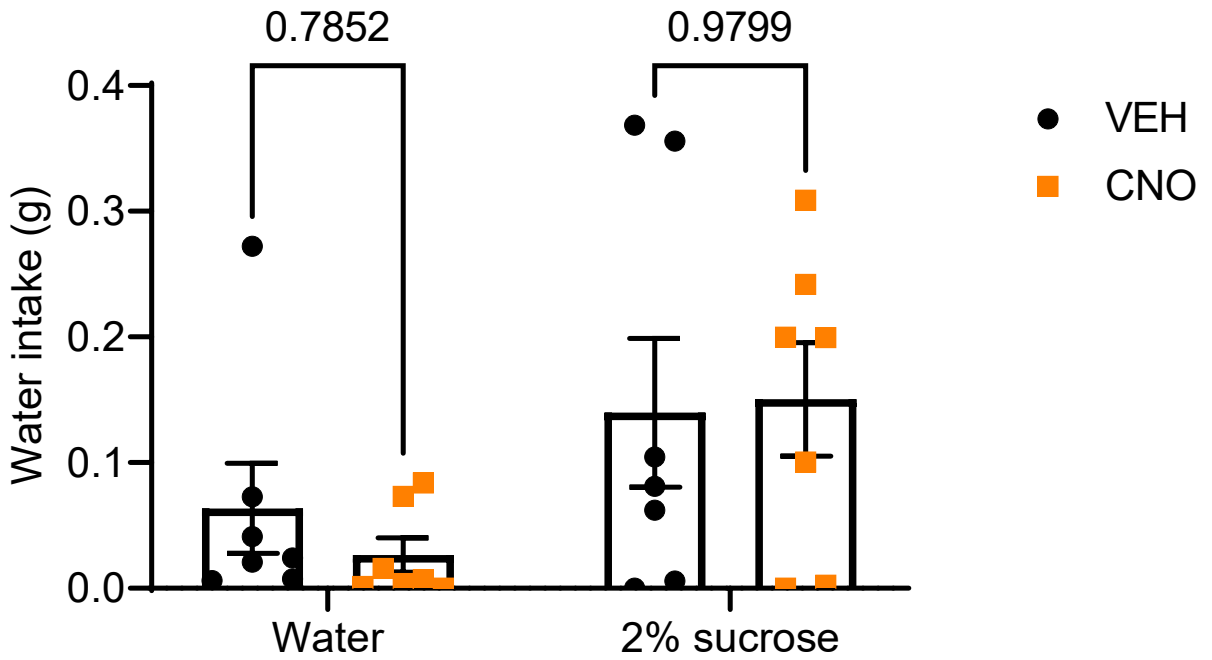

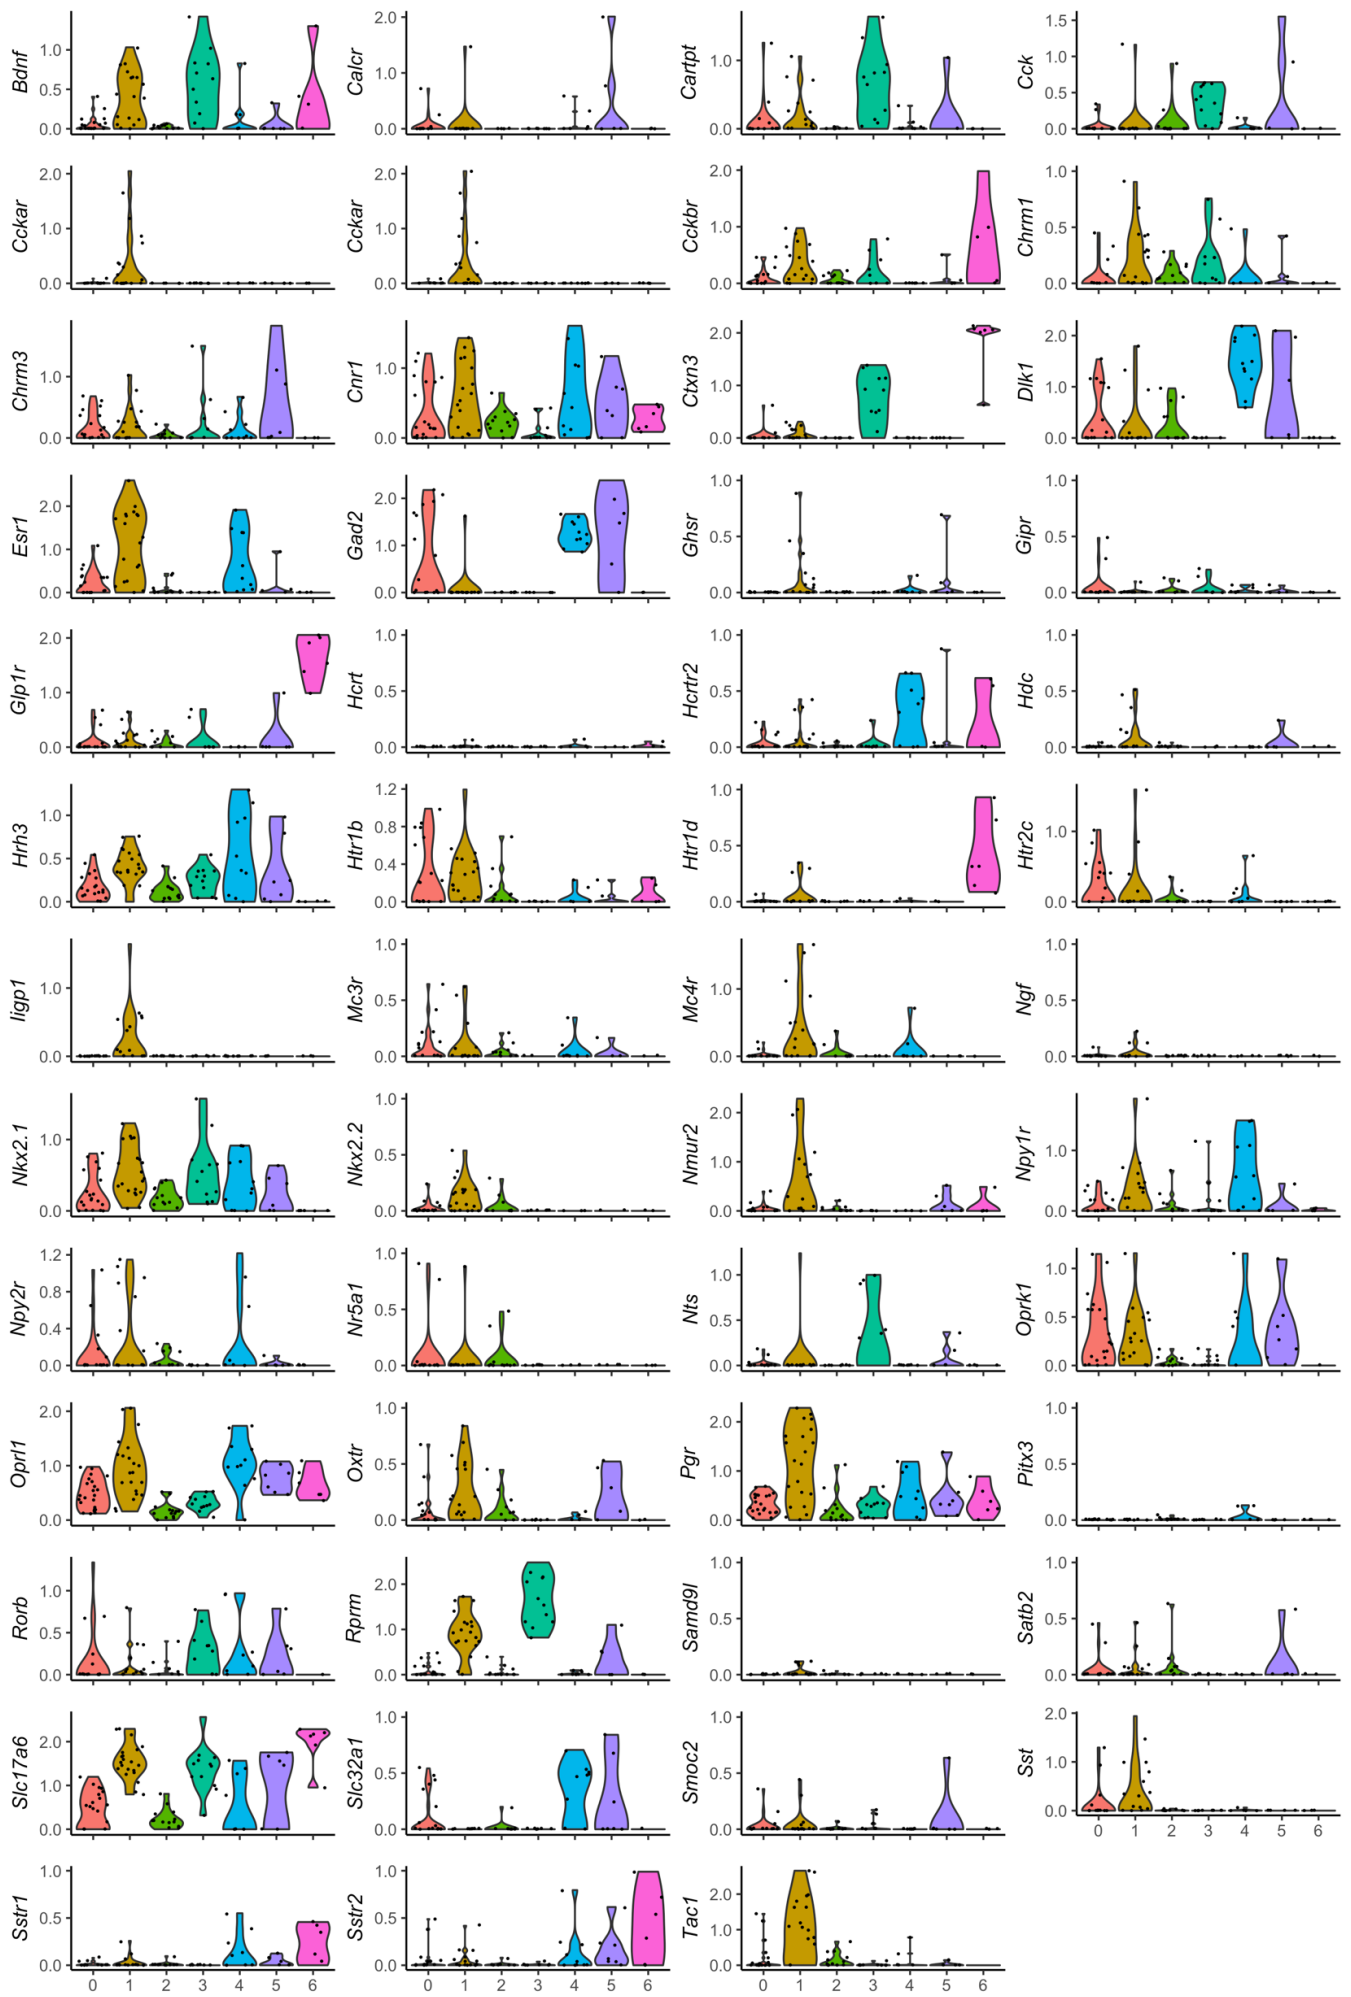

Supplementary figure 5



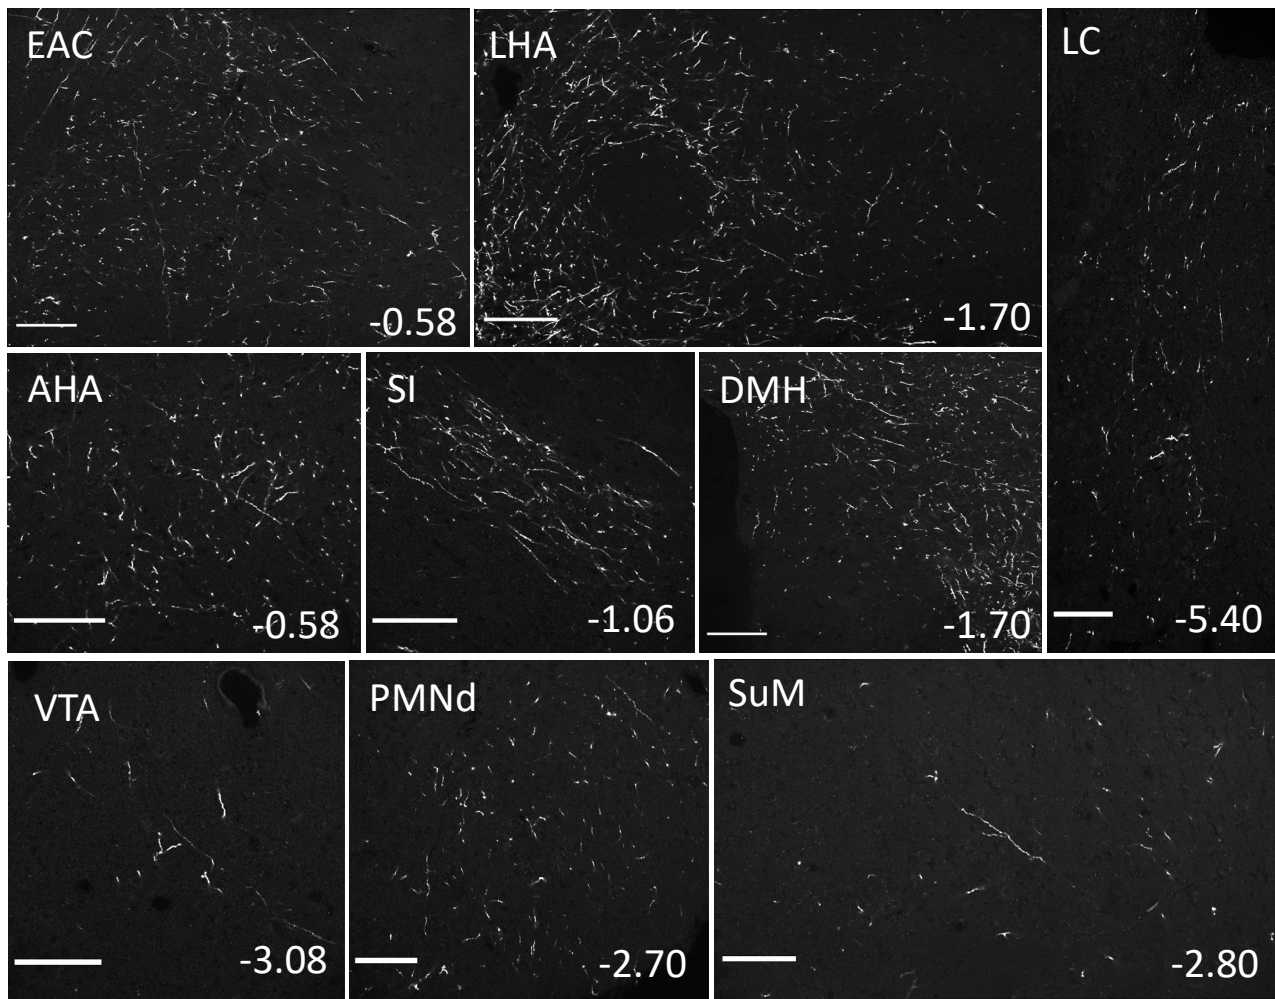

Supplementary Figure 6

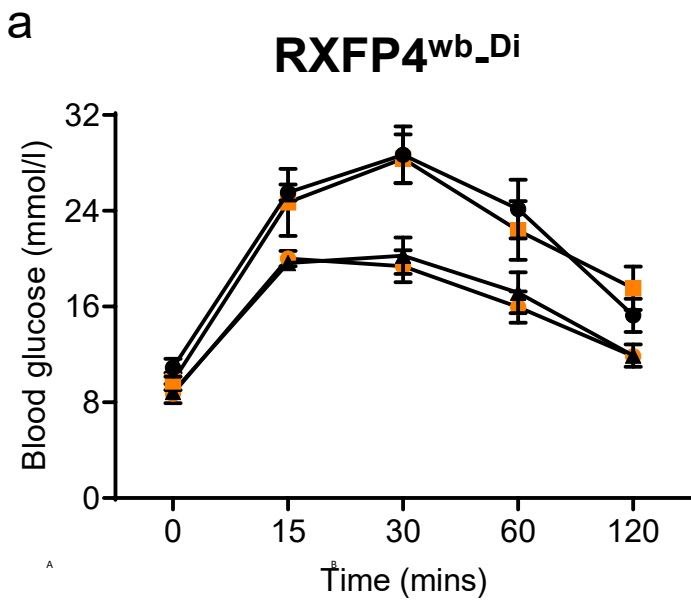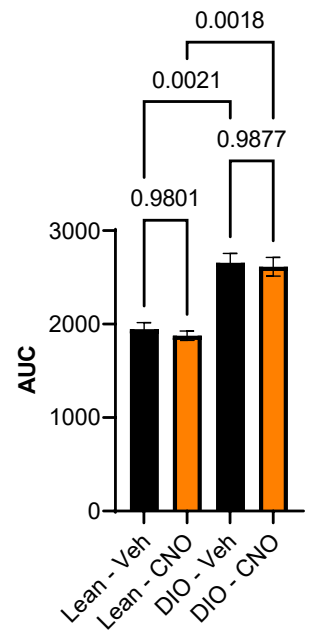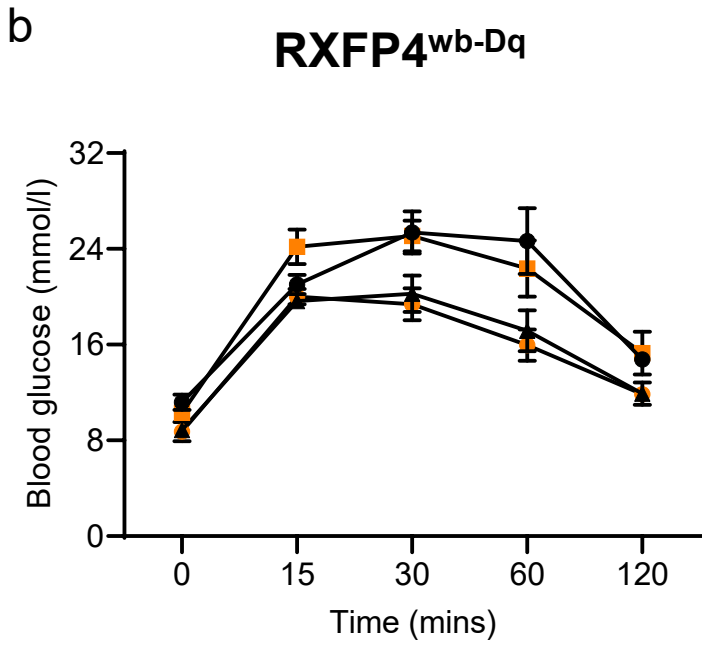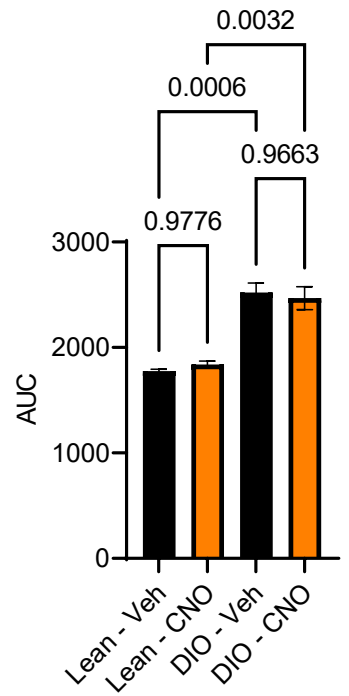

Supplement: Supplementary file [file media-1.pdf]
